# Supplementary material for: Synthesis of α-indolylacrylates as potential anticancer agents using a Brønsted acid ionic liquid catalyst and the butyl acetate solvent
Source: Royal Society of Chemistry journal article supplement (doi:10.1039/d0ra00990c), 2020-01-01

## Synthesis of $\alpha$ -Indolylacrylates as potential anti-cancer agents by Brønsted acid ionic liquid catalyst and butyl acetate solvent†

Ahmed El-Harairy,<sup>\*a,b</sup> Mennatallah Shaheen,<sup>c</sup> Jun Li,<sup>b</sup> Yuzhou Wu,<sup>b</sup> Minghao Li,<sup>b</sup> and Yanlong Gu<sup>a,d</sup>

<sup>a</sup> Environmental, Energy and Green Chemistry Laboratory, Faculty of Agriculture, Damietta University, 34511, Damietta, Egypt

<sup>b</sup> School of Chemistry and Chemical Engineering, Huazhong University of Science and Technology, 430074, Wuhan, China.

<sup>c</sup> Department of Pharmaceutical Chemistry, Faculty of Pharmacy, Horus University-Egypt, 34511, New Damietta, Damietta, Egypt.

<sup>d</sup> State Key Laboratory for Oxo Synthesis and Selective Oxidation, Lanzhou Institute of Chemical Physics, Lanzhou, 730000, China.

### 1. Synthesis of ionic liquid **1a**<sup>1</sup>

Brønsted acid IL **1a** was synthesized through the following three steps: (i) synthesis of **2a**: in 100 ml of around bottomed flask equipped with mechanical stirring, equal amount of divinyl sulfone **2a** (5.0 g, 42.3 mmol) was mixed with 1-(3-aminopropanyl)imidazole (5.2 g, 42.3 mmol) in 75 ml of methanol; the mixture was stirred at 60 °C for 24 h; then, volatile methanol was removed by a rotary evaporator; a yellow-pale oil was obtained, which is **2a**, in nearly quantitative yield. (ii) synthesis of **3a** via quaternization: **2a** (10.0 g, 41.1 mmol), 1,3-propanesulfonate (10.0 g, 82.3 mmol), and acetonitrile (75 ml) were mixed in a 250 ml of around bottomed flask equipped with mechanical stirring; the mixture was stirred at 80 °C for 24 h; a yellow solid was generated; then the solvent was decanted out; the yellow solid was filtrated, and washed with acetone (5.0 ml  $\times$  3); **3a** can be obtained as white solid; then, the white solid was dried at 60 °C under vacuum (20 mmHg) for 4 h; and (iii) acidification: **3a** (10.0 g, 20.5 mmol) was mixed with triflic acid (3.1 g, 20.5 mmol) in 25 mL of around bottomed flask; to facilitate the reaction, a small amount of water (0.25 ml) was also added in this step. Then, the mixture was stirred at 100 °C for 24 h. The generated ionic liquid was washed with ethyl acetate (5.0 ml  $\times$  3) and diethyl ether (5.0 ml  $\times$  3); then, water and volatile solvents were removed under reduced pressure; finally, **1a** was obtained as a yellow-pale viscous liquid. Through all these three-step reactions, the ionic liquid **1a** can be synthesized in 88% yield.

### 2. Synthesis of Forbes's ionic liquid **1b**<sup>2</sup>

1-Methylimidazole (8.2 g, 0.1 mol) is stirred under solvent-free conditions with 1,3-propanesultone (12.2 g, 0.1 mol) at 50 oC for 6 hours. After reaction, the obtained viscous liquid was washed with ethyl acetate (10 ml  $\times$  3) and then dried under vacuum (10 mmHg) for 2 hours. With this procedure, 3-(1-methyl-3-imidazolio)propanesulfonate was obtained in 97 % of yield (mp. = 215-216 oC). In a 100 ml of round bottomed flask equipped with mechanical stirring, 3-(1-methyl-3-imidazolio)propanesulfonate (10.2 g, 50 mmol) was mixed with trifluoromethanesulfonic acid (7.5 g, 50 mmol). The mixture was then heated at 80 °C for 6 hours under stirring. Then, the generated viscous liquid washed with ethyl acetate (10 ml  $\times$  3). After 6 hours of drying at 60 °C under vacuum (20 mmHg), Forbes's IL **1b** was obtained as a brown viscous liquid (16.8 g, 95 %).

### 3. Synthesis of ionic liquid **1c**<sup>3</sup>

In 250 ml of round bottomed flask equipped with mechanical stirring, divinyl sulfone **2c** (11.8 g, 0.10 mol) was mixed with n-butylamine (7.3 g, 0.10 mol) in methanol (150 ml). The mixture was then stirred at 60 °C for 5 hours. Methanol was removed by a rotary evaporator under vacuum, and **3c** was obtained as a color-less oil quantitatively. The obtained **3c** was then mixed with 1,3-propane sultone (13.4 g, 0.11 mol) in acetonitrile (150 ml). The solution was refluxed for 5 hours. Then, the generated white solid was filtrated, and washed with acetone (10 ml  $\times$  3). After 6 hours of drying at 60 °C under vacuum (20 mmHg), **4c** was obtained as a white powder (23.1 g, 74 %). In a 100 ml of round bottomed flask, **4c** (15.6 g, 50 mmol) was mixed with trifluoromethanesulfonic acid (7.5 g, 50 mmol). Then, the mixture was stirred at 80 °C for 8 hours. In order to facilitate the stirring, water (1.0 ml) was added into the system. The formed liquid was washed with ethyl acetate (15 ml  $\times$  3) and diethyl ether (15 ml  $\times$  3). After that, it was dried at 80 °C under vacuum (10 mmHg) for 4 hours. Finally, IL **1c** was obtained as a viscous brown oil (22.2g, 96 %).

### 4. Figure S1: X-ray Single Crystal Data for **5a**

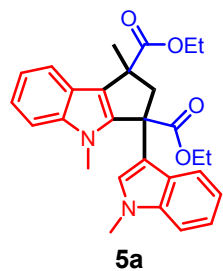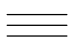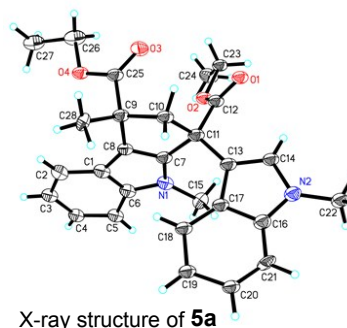

**Table 1. Crystal data and structure refinement for 5a.**

|                                    |                                                               |
|------------------------------------|---------------------------------------------------------------|
| Identification code                | exp_1776                                                      |
| Empirical formula                  | C <sub>28</sub> H <sub>30</sub> N <sub>2</sub> O <sub>4</sub> |
| Formula weight                     | 458.54                                                        |
| Temperature/K                      | 100.01(10)                                                    |
| Crystal system                     | monoclinic                                                    |
| Space group                        | P2 <sub>1</sub>                                               |
| a/Å                                | 16.179(2)                                                     |
| b/Å                                | 8.8178(15)                                                    |
| c/Å                                | 17.233(2)                                                     |
| α/°                                | 90                                                            |
| β/°                                | 103.819(13)                                                   |
| γ/°                                | 90                                                            |
| Volume/Å <sup>3</sup>              | 2387.3(6)                                                     |
| Z                                  | 2                                                             |
| ρ <sub>calc</sub> /cm <sup>3</sup> | 0.638                                                         |
| μ/mm <sup>-1</sup>                 | 0.043                                                         |
| F(000)                             | 488.0                                                         |
| Crystal size/mm <sup>3</sup>       | 0.13 × 0.12 × 0.11                                            |
| Radiation                          | MoKα (λ = 0.71073)                                            |
| 2θ range for data collection/°     | 4.868 to 49.98                                                |

|                                                |                                                                  |
|------------------------------------------------|------------------------------------------------------------------|
| Index ranges                                   | -15 ≤ h ≤ 19, -8 ≤ k ≤ 10, -20 ≤ l ≤ 20                          |
| Reflections collected                          | 11382                                                            |
| Independent reflections                        | 7256 [ $R_{\text{int}} = 0.0473$ , $R_{\text{sigma}} = 0.0860$ ] |
| Data/restraints/parameters                     | 7256/109/174                                                     |
| Goodness-of-fit on $F^2$                       | 1.070                                                            |
| Final R indexes [ $I \geq 2\sigma(I)$ ]        | $R_1 = 0.0732$ , $wR_2 = 0.1990$                                 |
| Final R indexes [all data]                     | $R_1 = 0.0787$ , $wR_2 = 0.2059$                                 |
| Largest diff. peak/hole / $e \text{ \AA}^{-3}$ | 0.51/-0.47                                                       |
| Flack parameter                                | -0.2(9)                                                          |

### Crystal structure determination of 5a

**Crystal Data** for  $\text{C}_{28}\text{H}_{30}\text{N}_2\text{O}_4$  ( $M = 458.54 \text{ g/mol}$ ): monoclinic, space group  $P2_1$  (no. 4),  $a = 16.179(2) \text{ \AA}$ ,  $b = 8.8178(15) \text{ \AA}$ ,  $c = 17.233(2) \text{ \AA}$ ,  $\beta = 103.819(13)^\circ$ ,  $V = 2387.3(6) \text{ \AA}^3$ ,  $Z = 2$ ,  $T = 100.01(10) \text{ K}$ ,  $\mu(\text{MoK}\alpha) = 0.043 \text{ mm}^{-1}$ ,  $D_{\text{calc}} = 0.638 \text{ g/cm}^3$ , 11382 reflections measured ( $4.868^\circ \leq 2\theta \leq 49.98^\circ$ ), 7256 unique ( $R_{\text{int}} = 0.0473$ ,  $R_{\text{sigma}} = 0.0860$ ) which were used in all calculations. The final  $R_1$  was 0.0732 ( $I > 2\sigma(I)$ ) and  $wR_2$  was 0.2059 (all data).

## 5. References

1. (a) A. El-Harairy, B. Lai, L. Vaccaro, M. Li, Y. Gu, *Advanced Synthesis & Catalysis*. 2019, **361**, 3342-3350; b) A. El-Harairy, M. Yue, W. Fan, F. Popowycz, Y. Queneau, M. Li, Y. Gu, *ChemCatChem*, 2019, **11**, 4403-4410.
2. Y. Gu, F. Shi, Y. Deng, *J. Mol. Catal. A: Chem.* 2004, **212**, 71–75.
3. A. Taheri, X. Pan, C. Liu, Y. Gu, *ChemSusChem* 2014, **7**, 2094–2100.

## 6. NMR Spectra

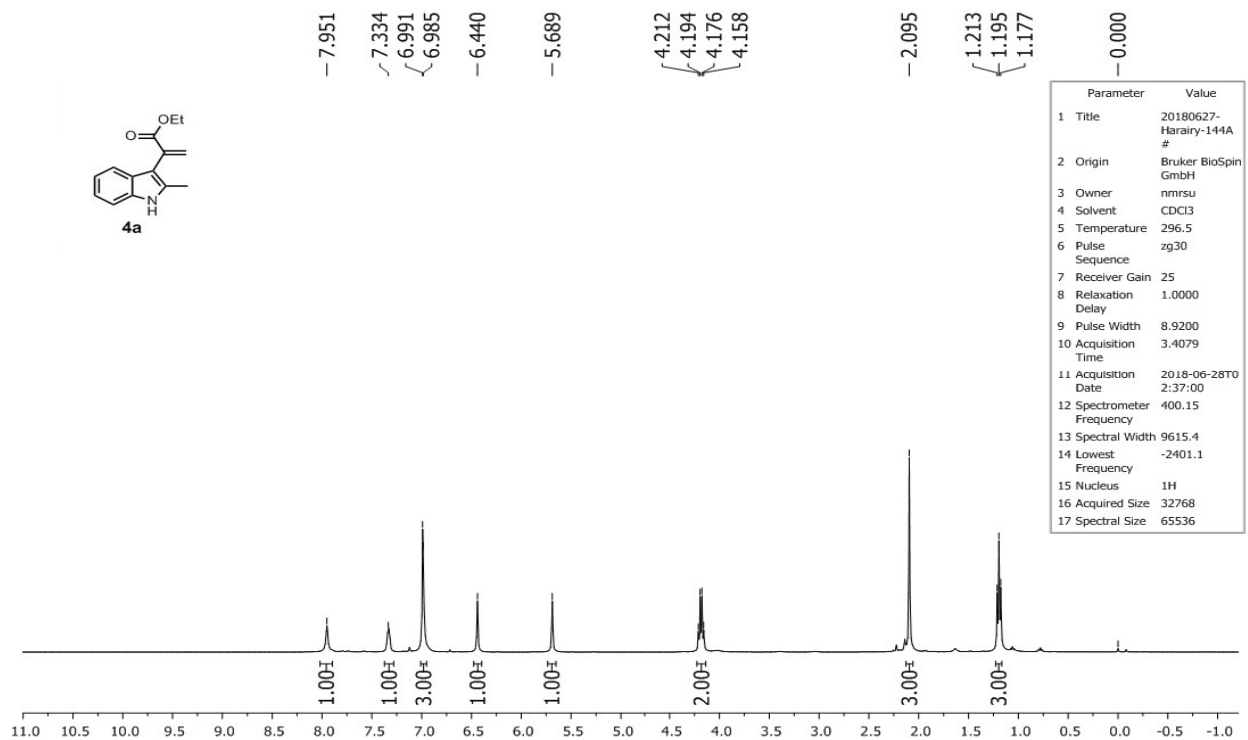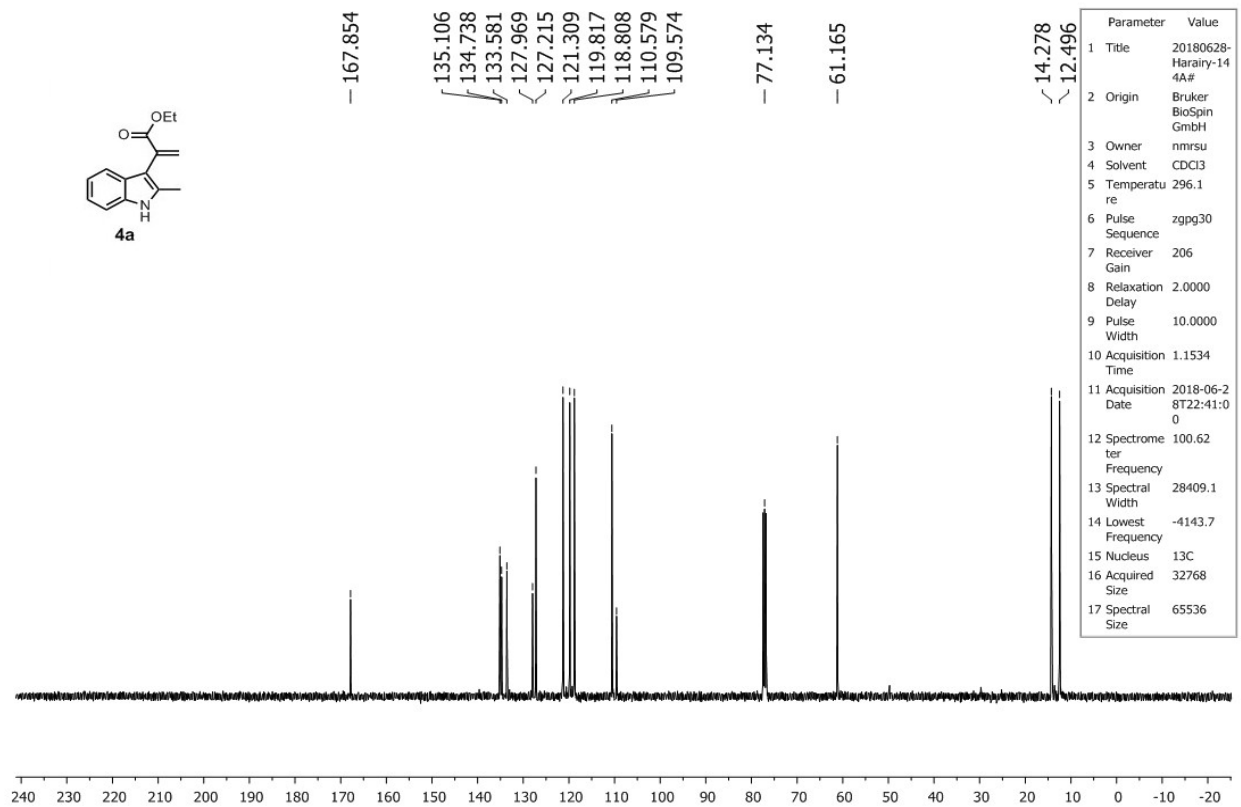

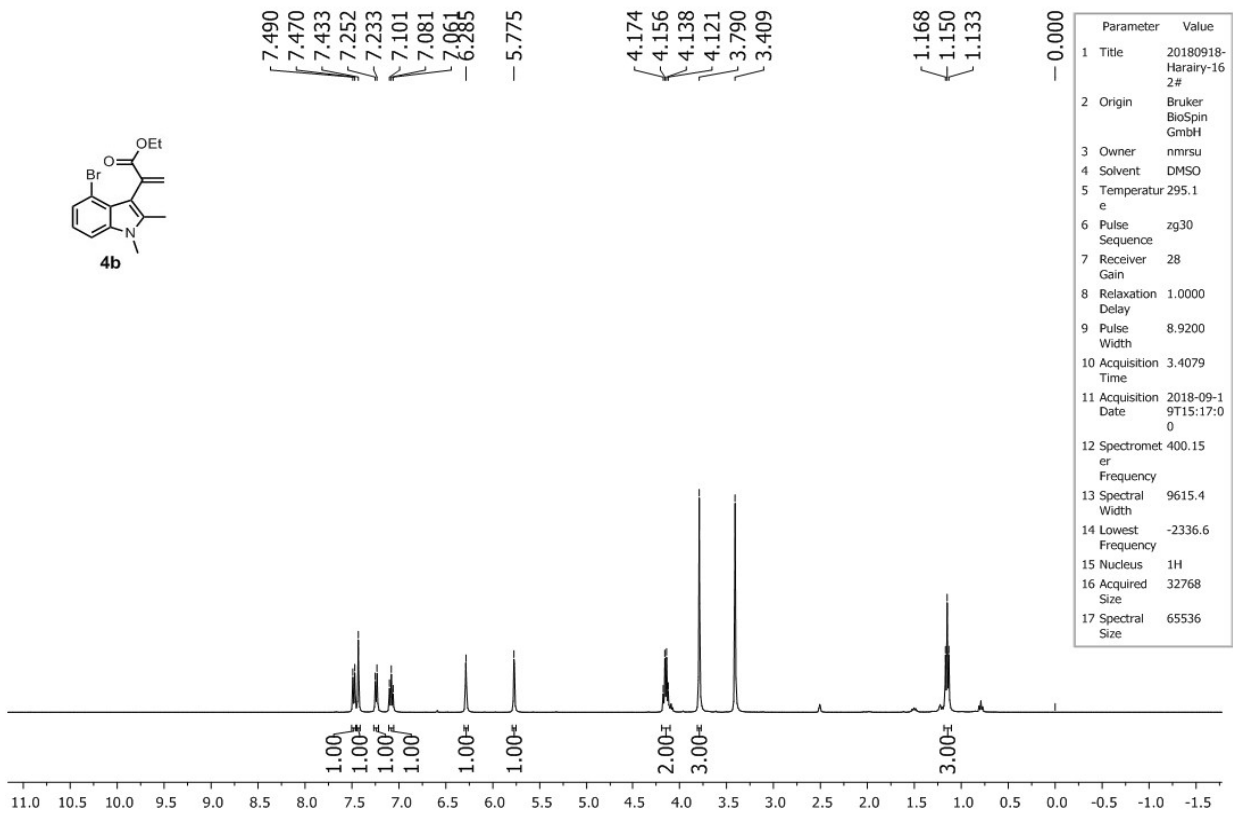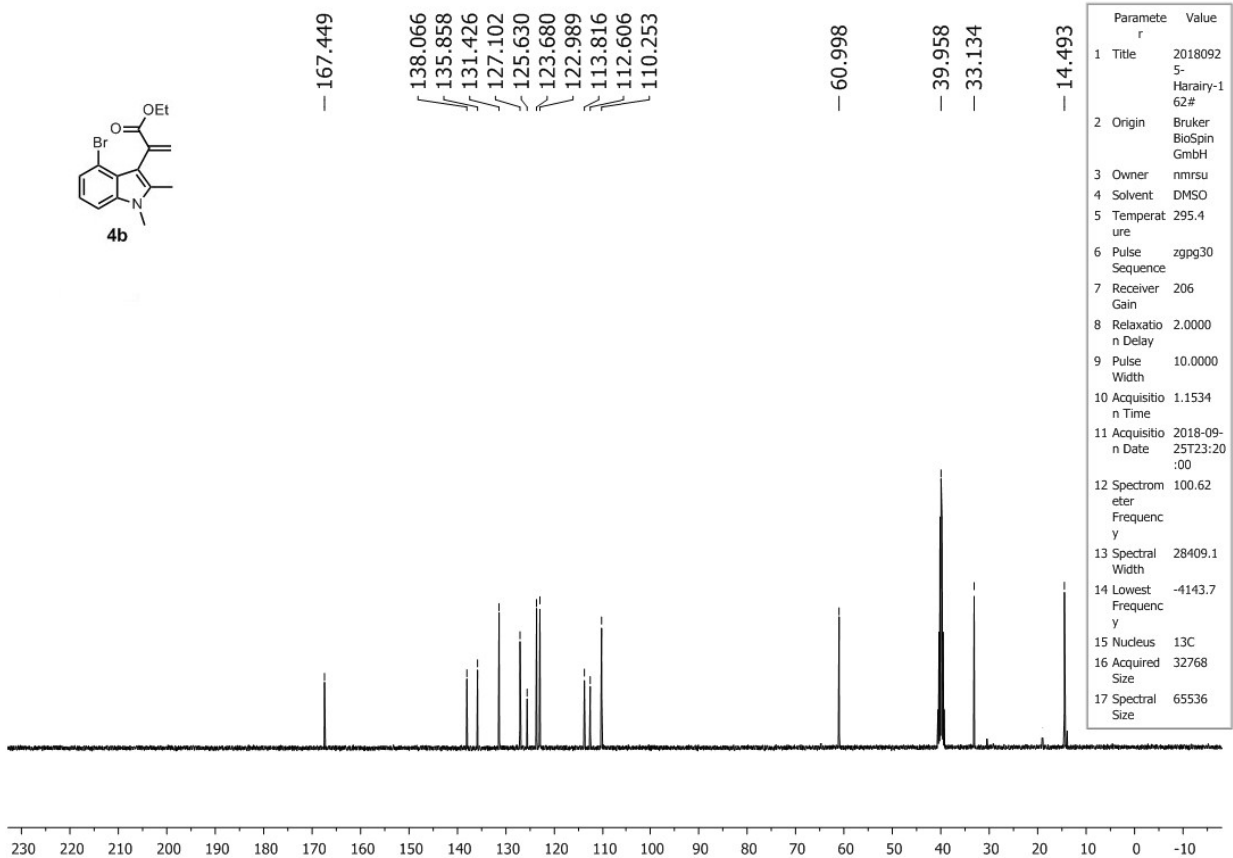

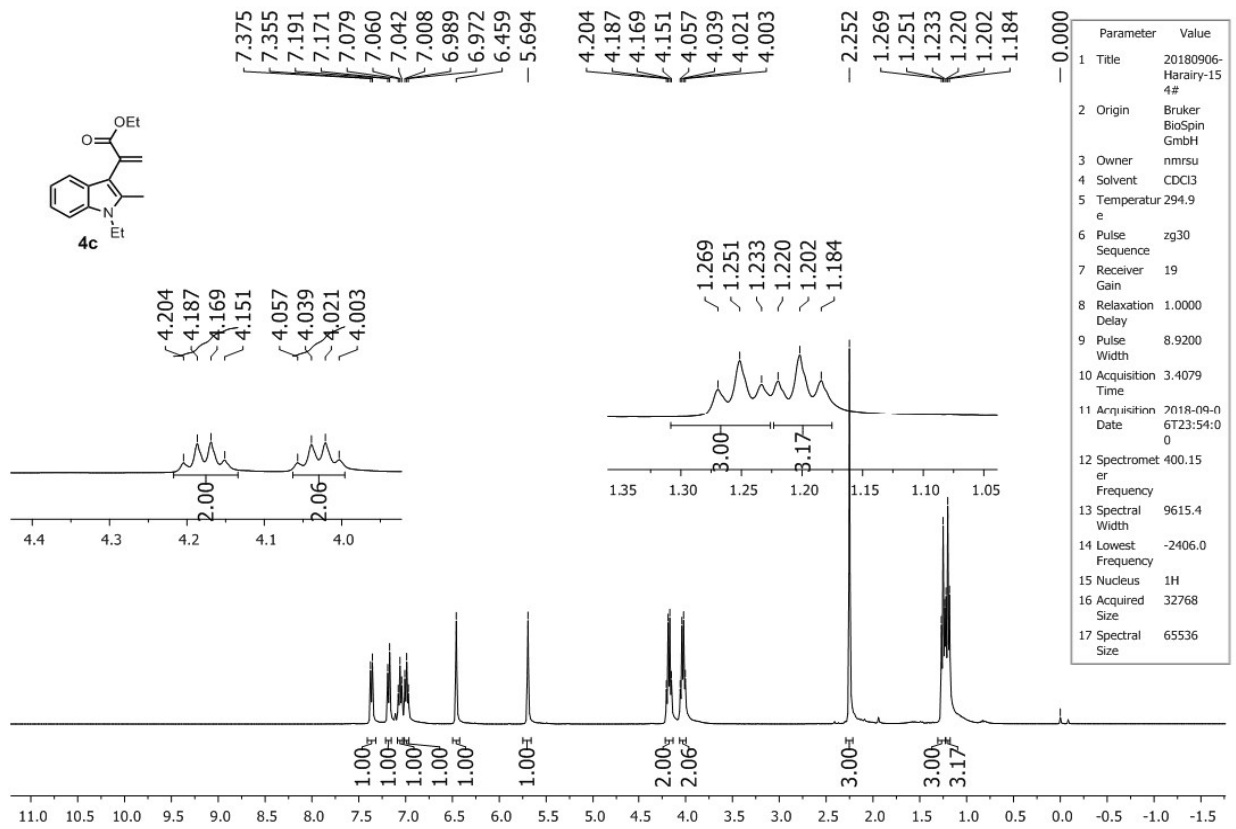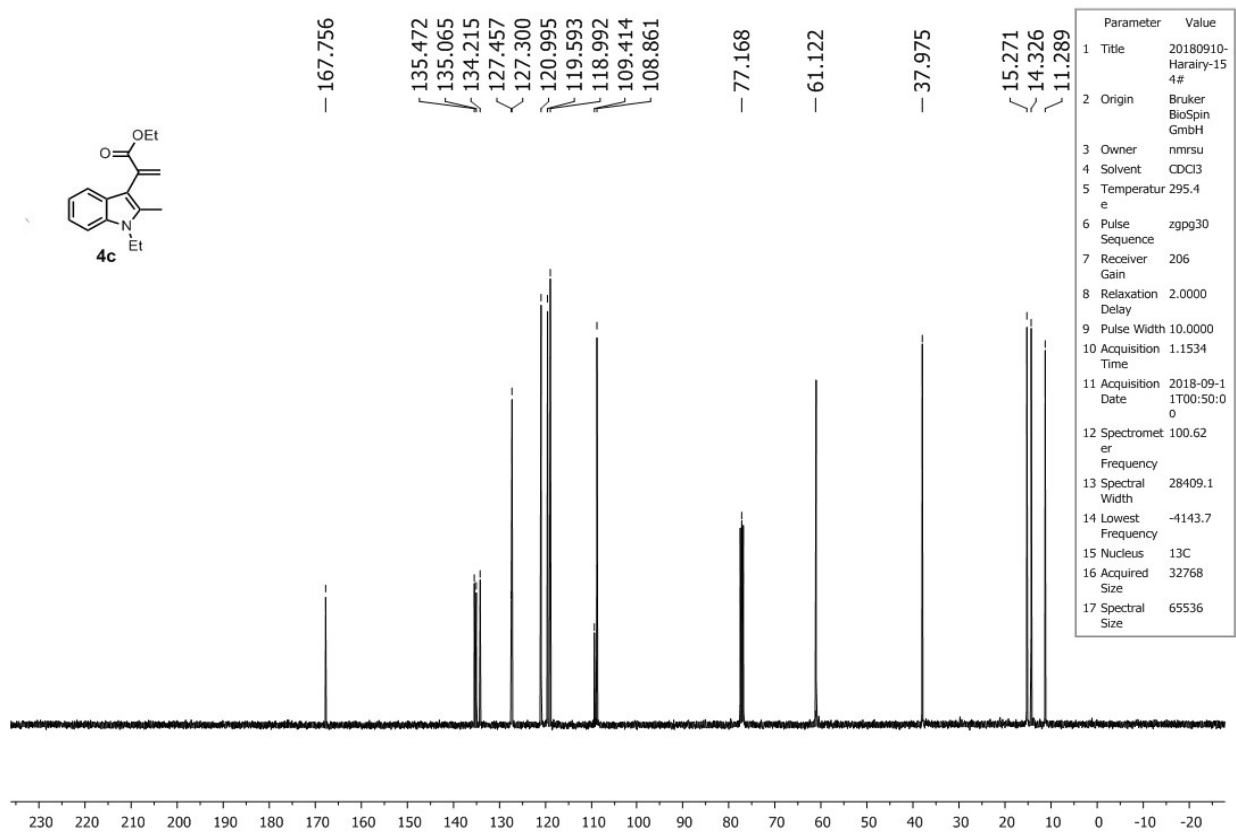

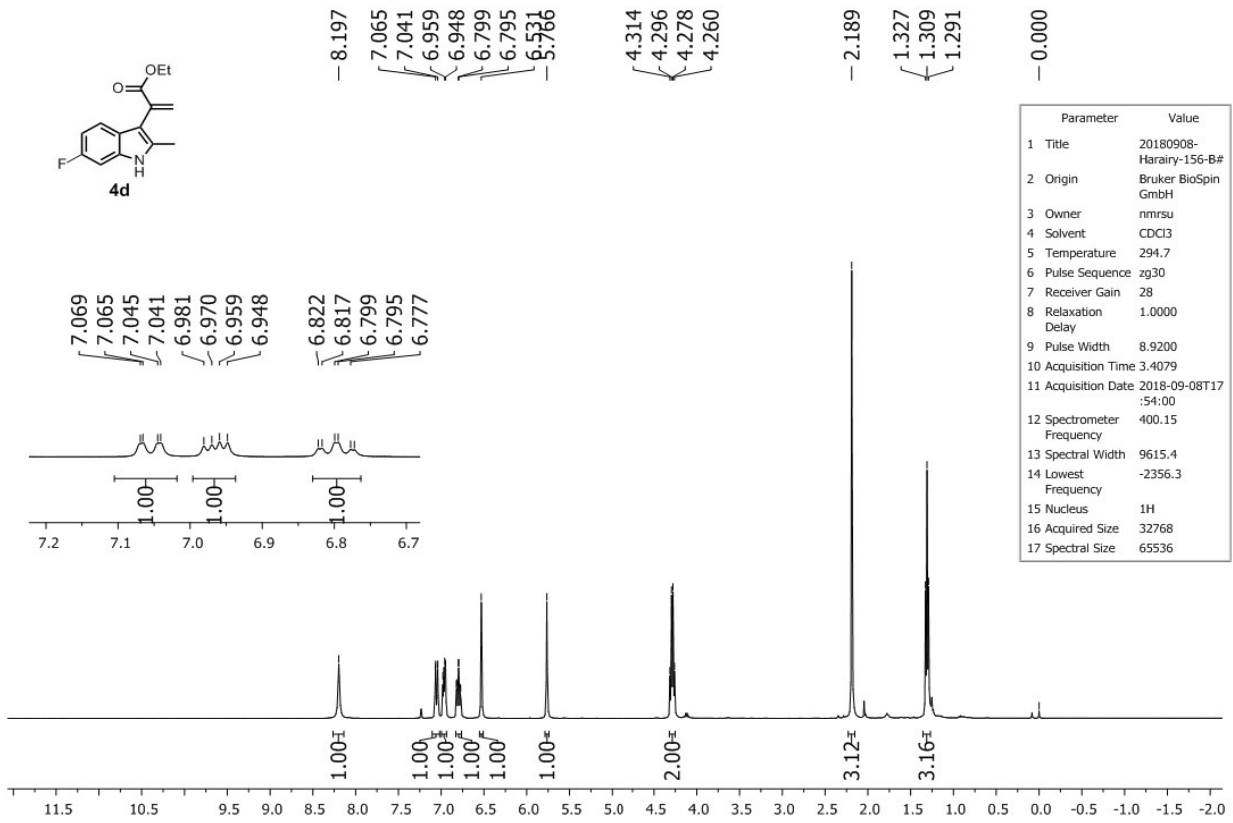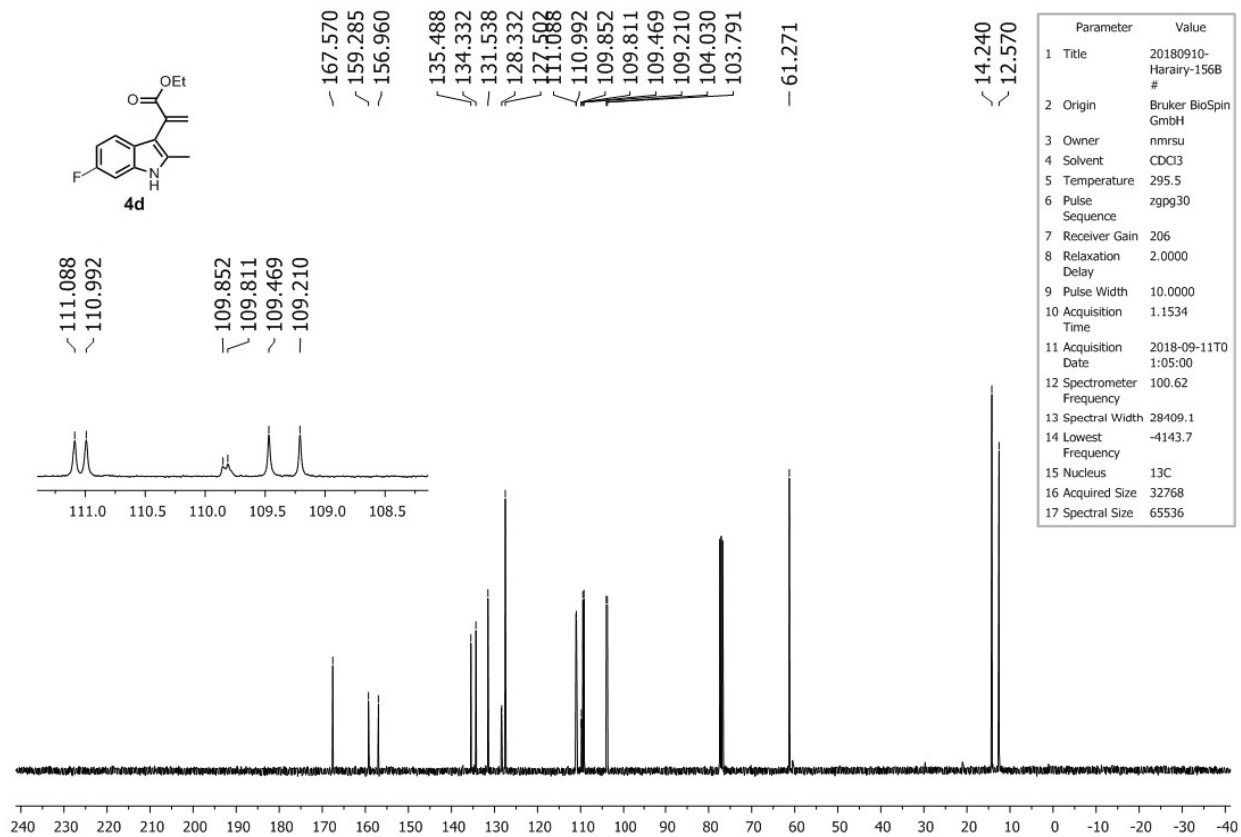

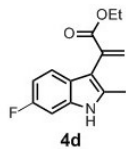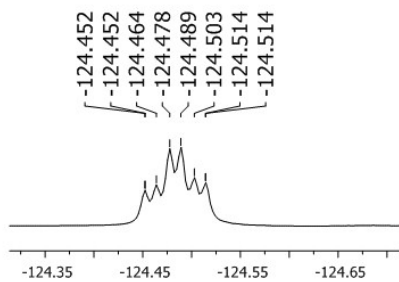

-124.452  
-124.452  
-124.464  
-124.478  
-124.489  
-124.503  
-124.514  
-124.514

| Parameter                 | Value                   |
|---------------------------|-------------------------|
| 1 Title                   | 20181108-Harairy-156-B# |
| 2 Origin                  | Bruker BioSpin GmbH     |
| 3 Owner                   | nmsu                    |
| 4 Solvent                 | CDCl3                   |
| 5 Temperature             | 295.2                   |
| 6 Pulse Sequence          | zgfgqn                  |
| 7 Receiver Gain           | 206                     |
| 8 Relaxation Delay        | 1.5000                  |
| 9 Pulse Width             | 14.0000                 |
| 10 Acquisition Time       | 0.5767                  |
| 11 Acquisition Date       | 2018-11-08T23:10:00     |
| 12 Spectrometer Frequency | 376.52                  |
| 13 Spectral Width         | 113636.4                |
| 14 Lowest Frequency       | -75644.0                |
| 15 Nucleus                | 13C                     |
| 16 Acquired Size          | 65536                   |
| 17 Spectral Size          | 131072                  |

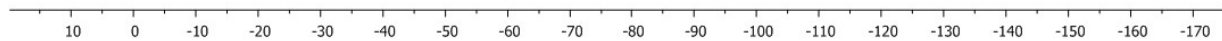



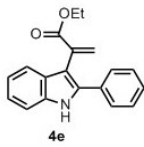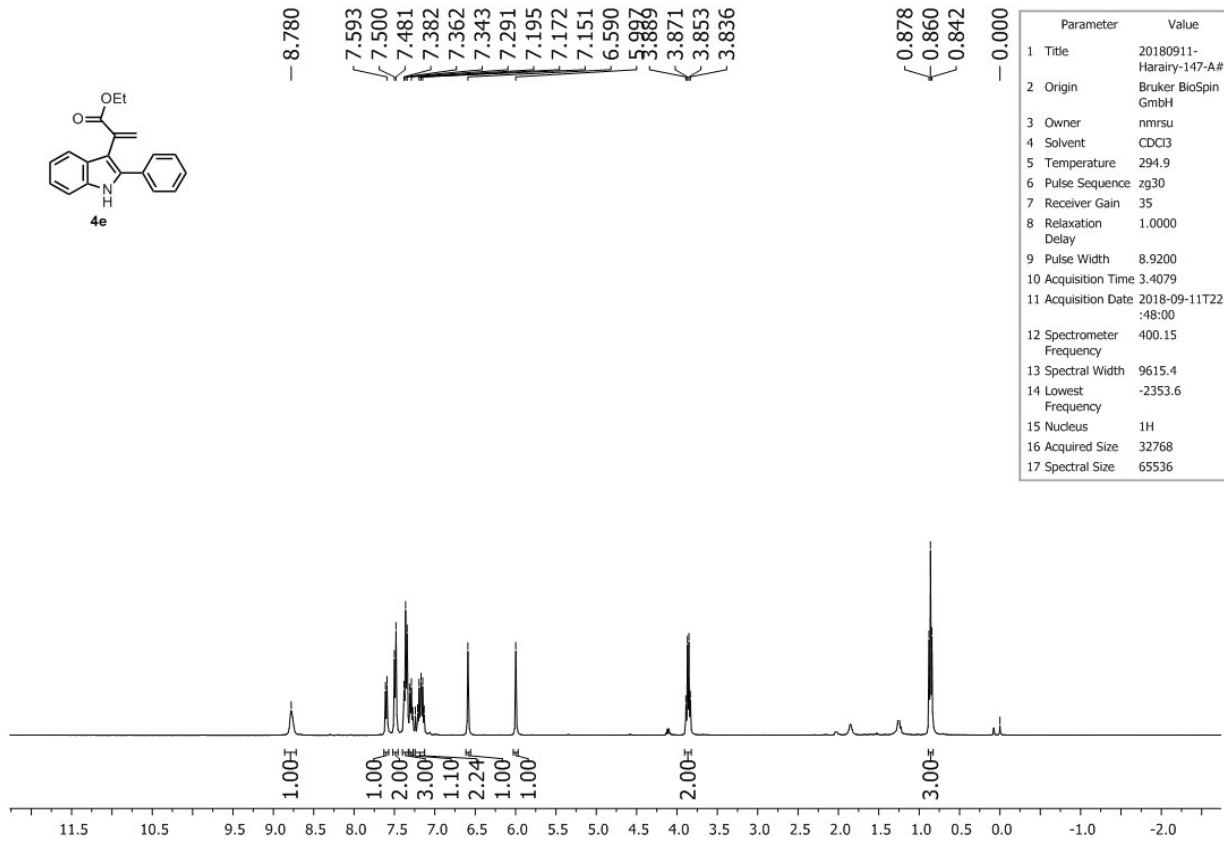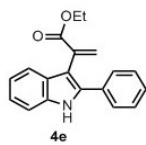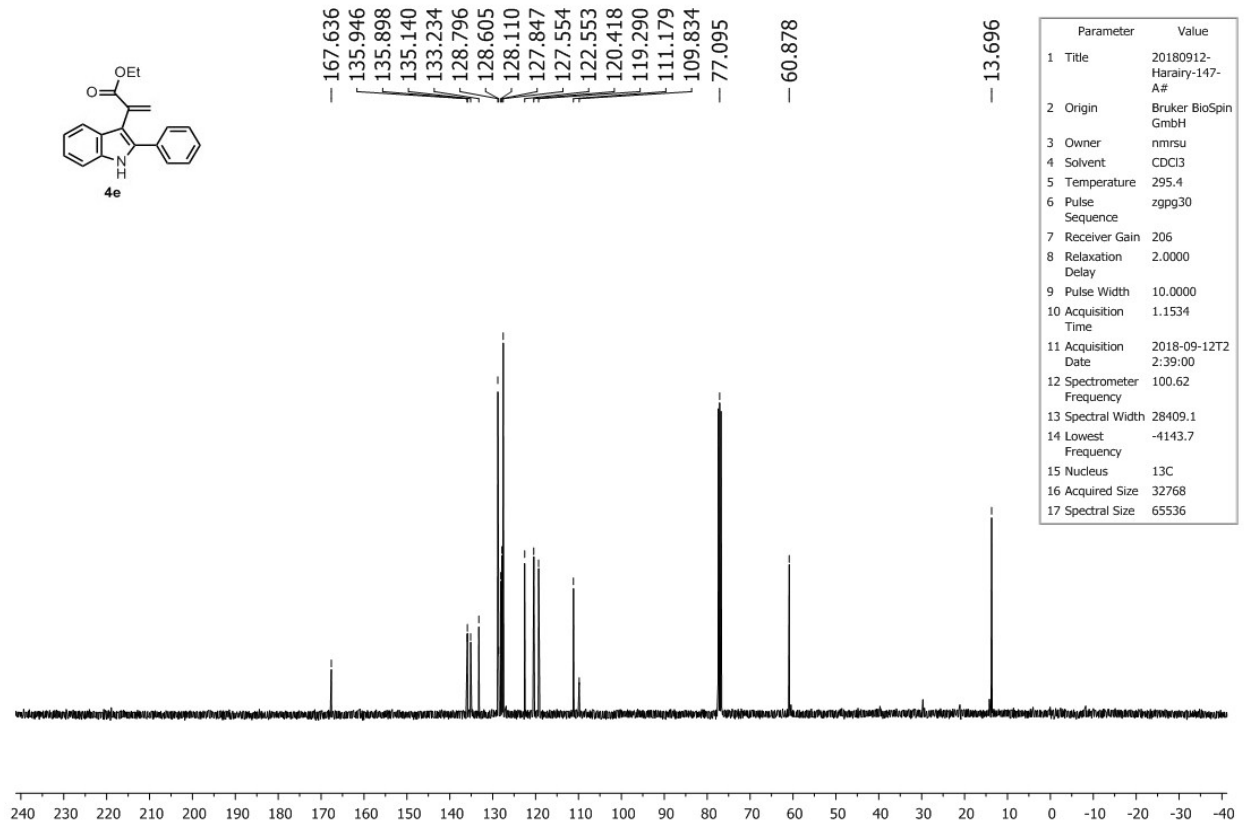

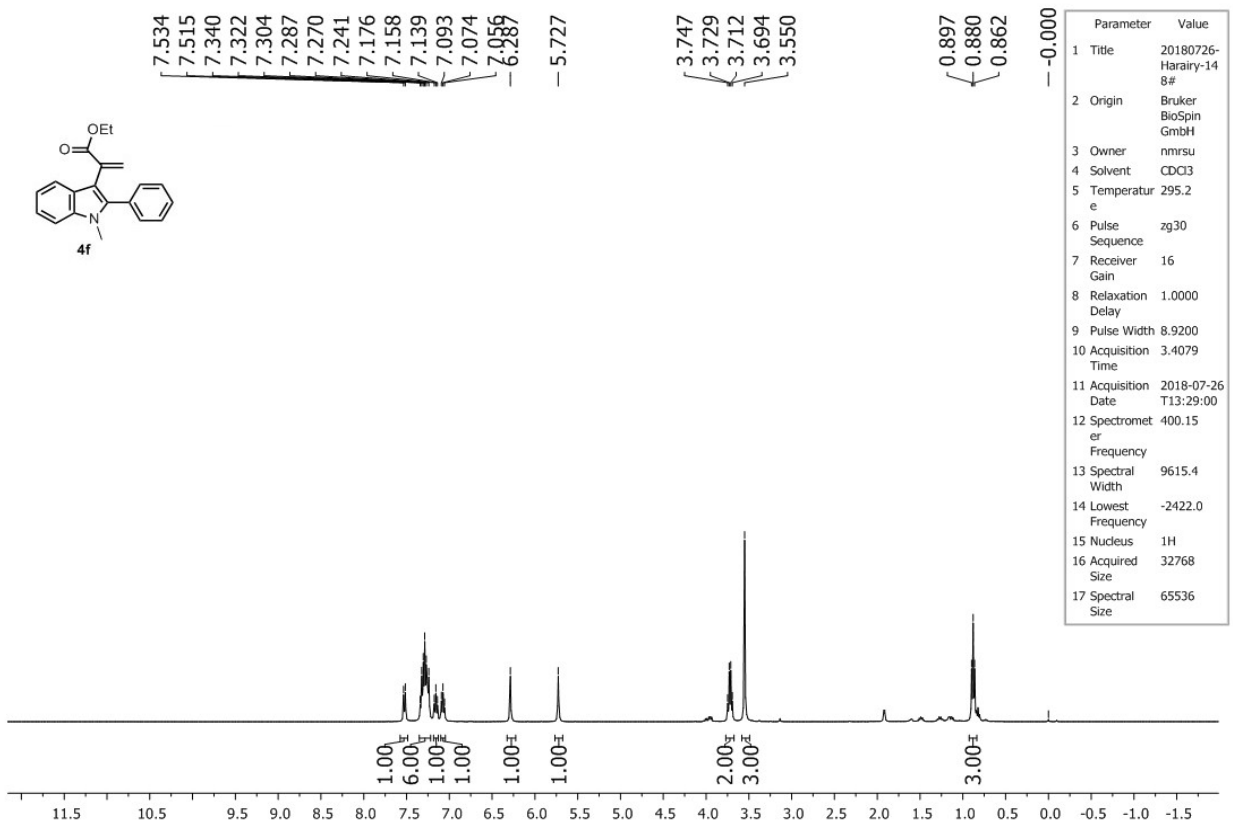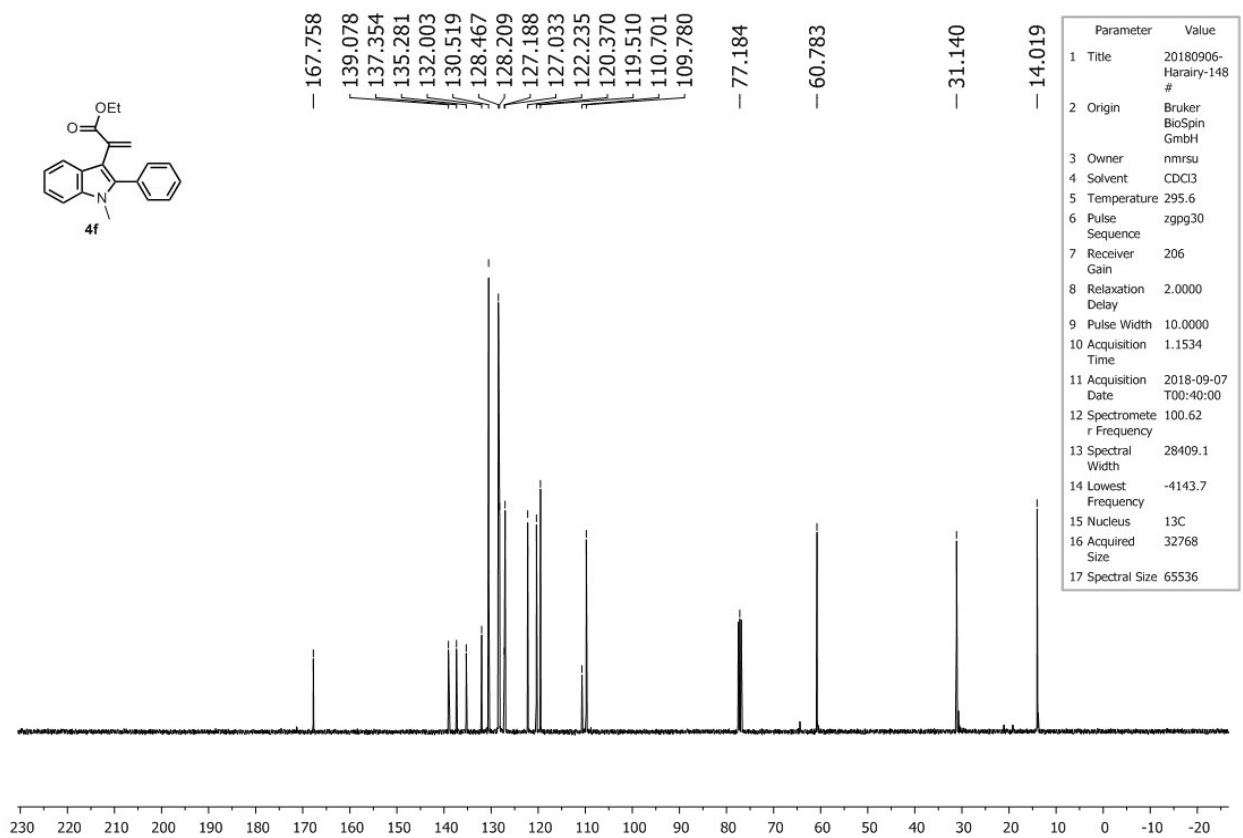

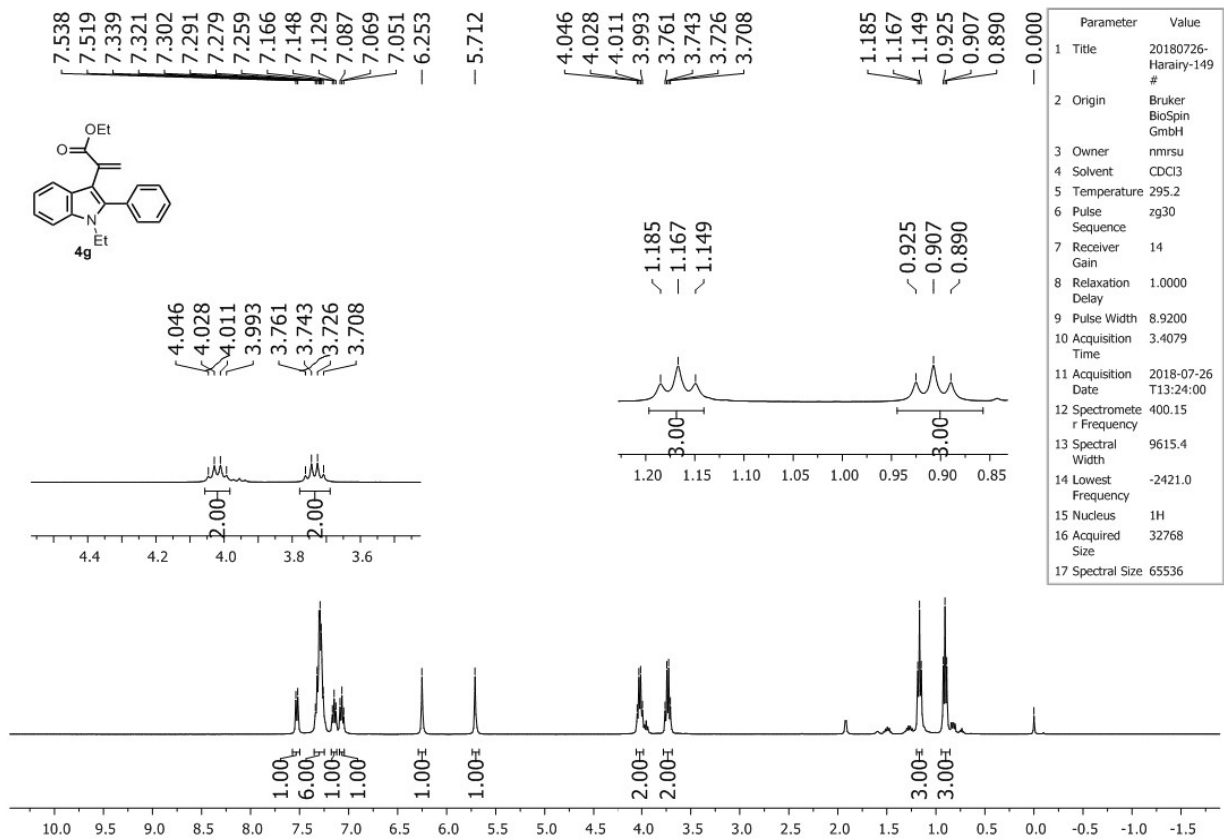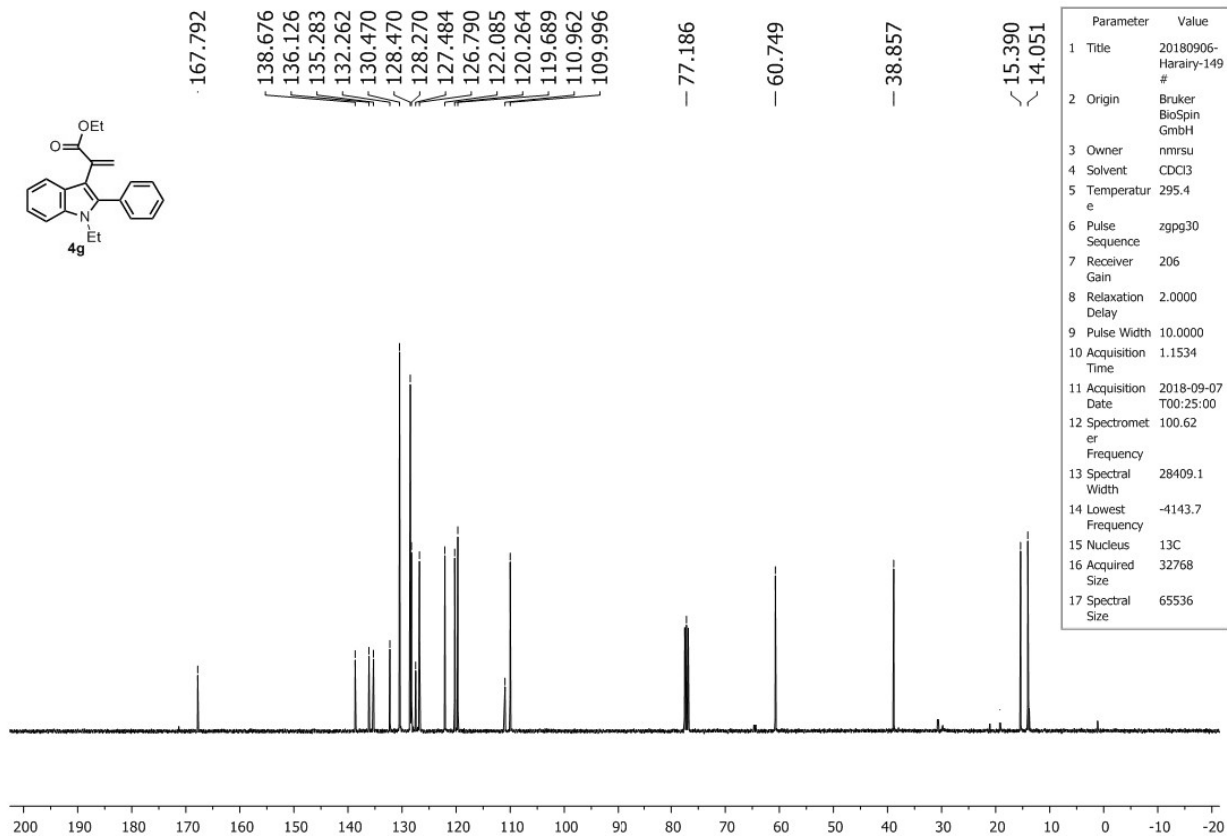

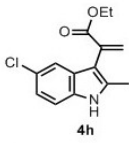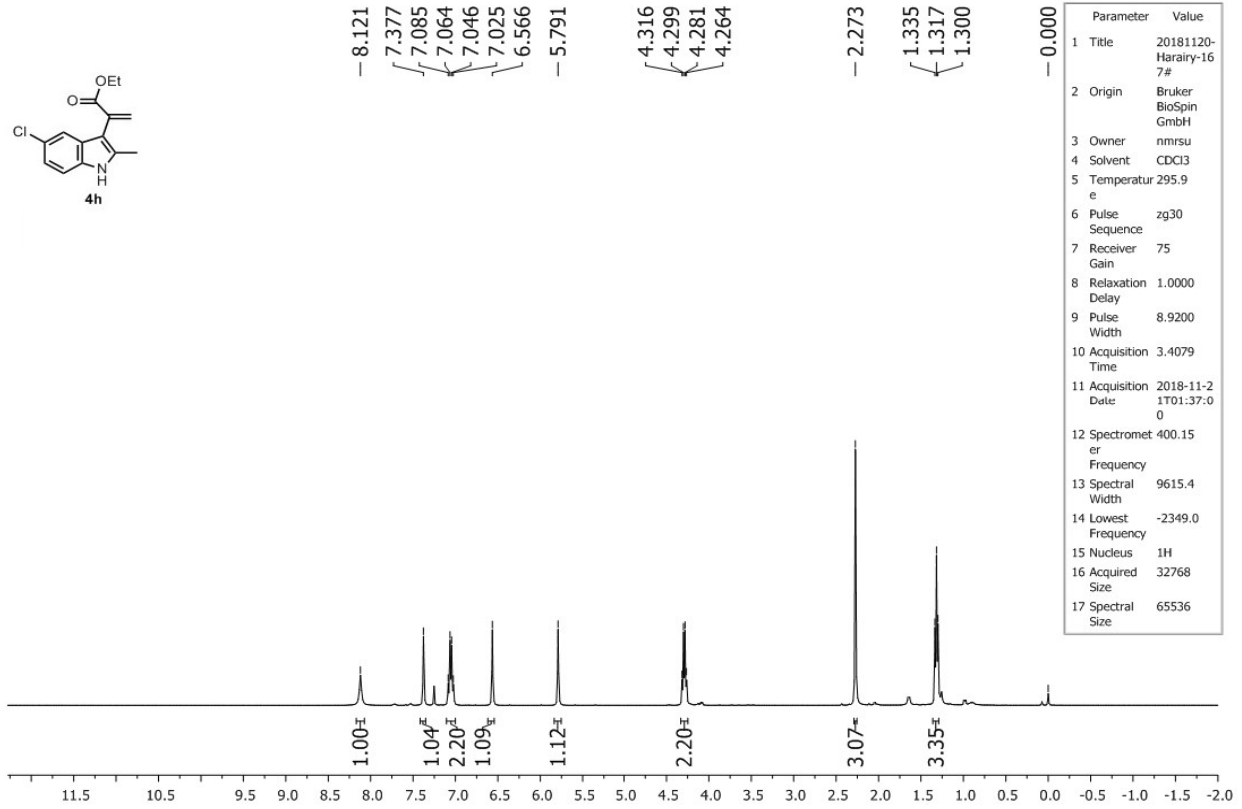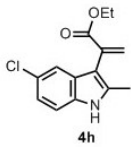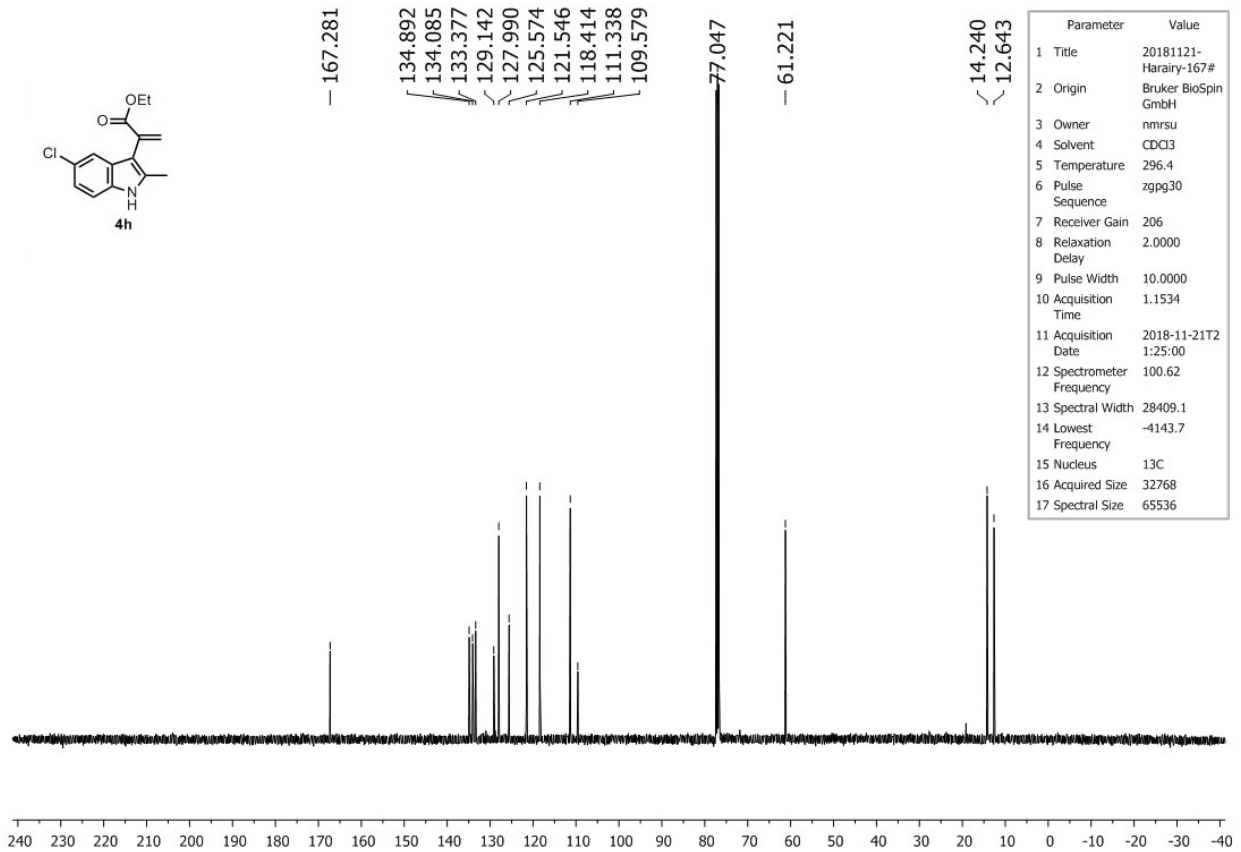

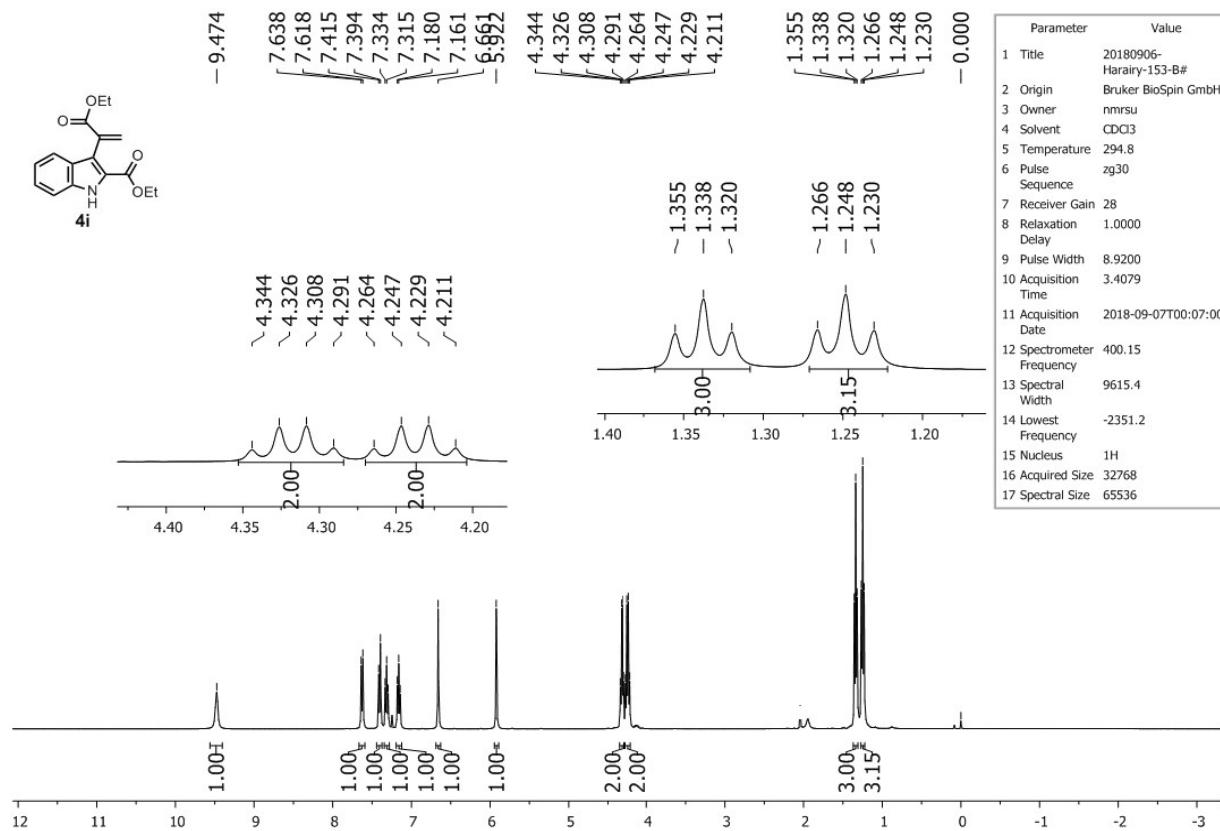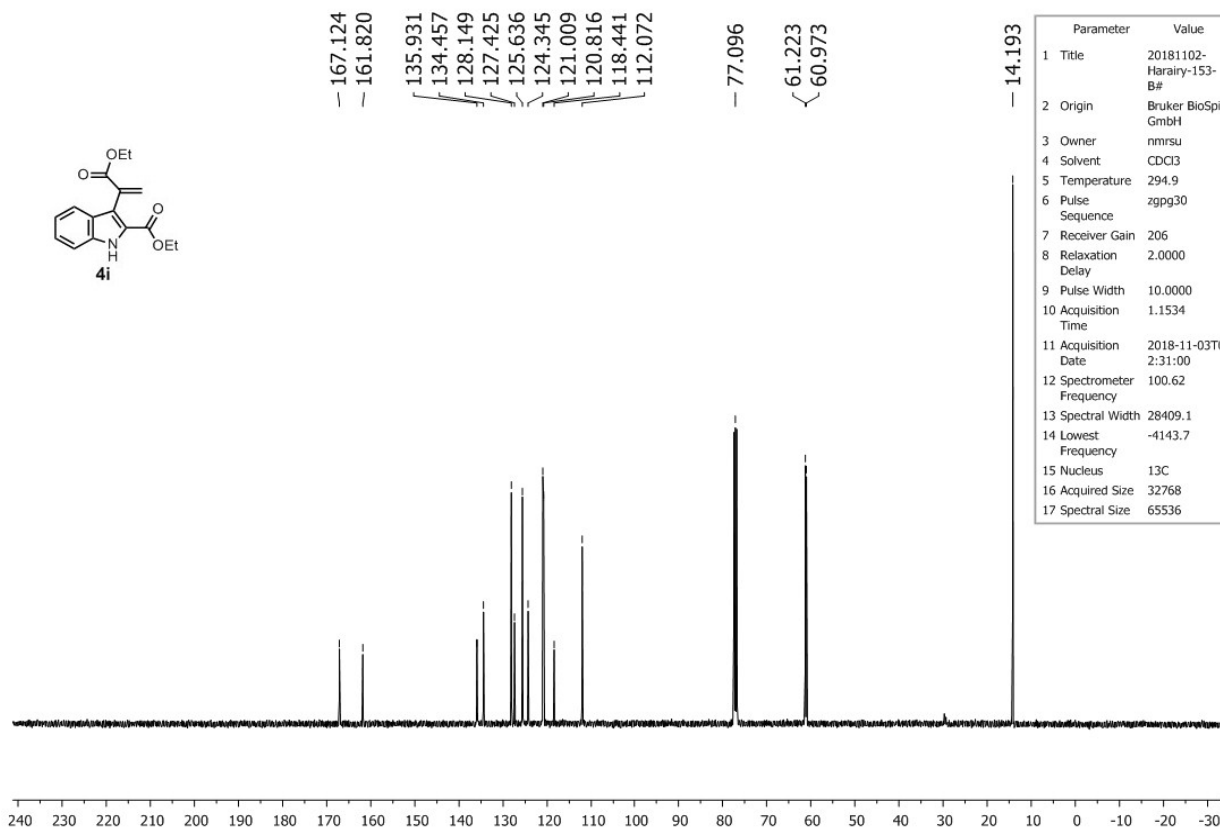

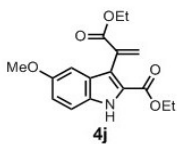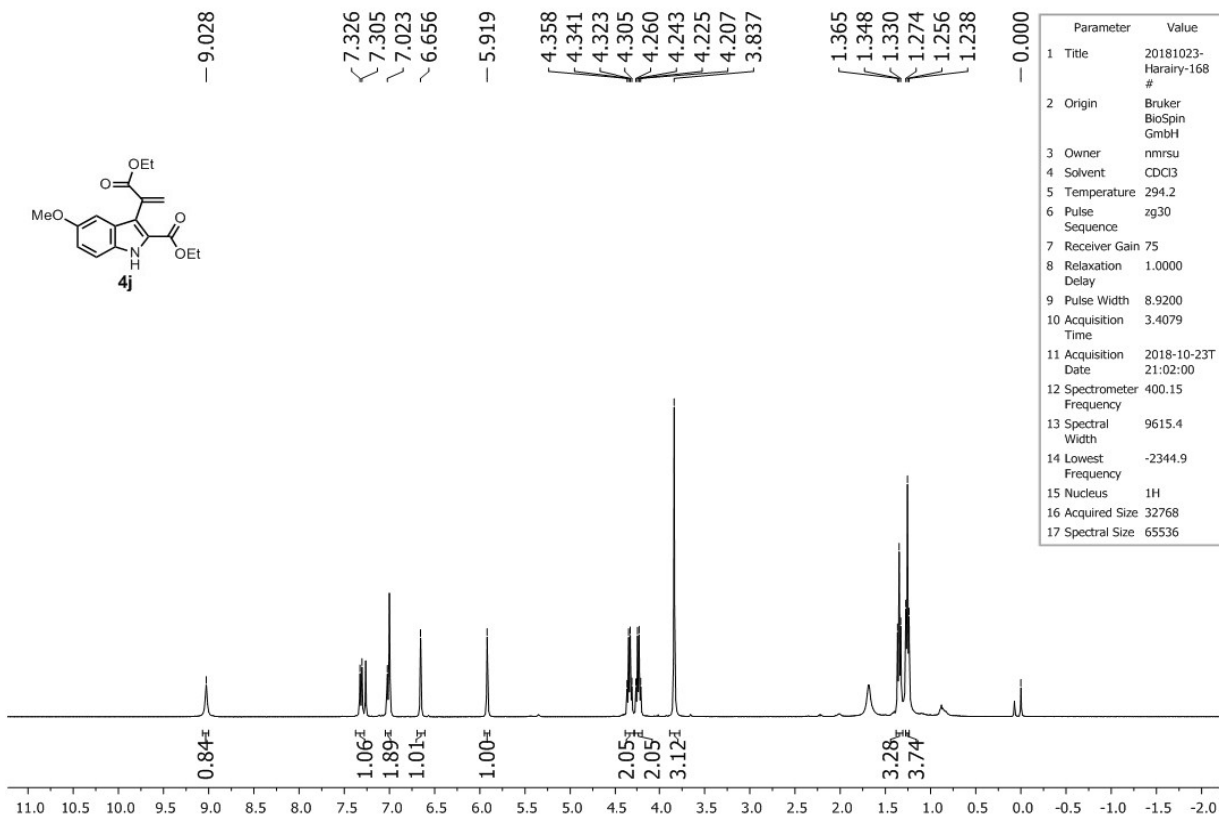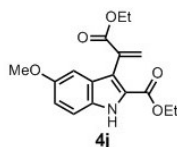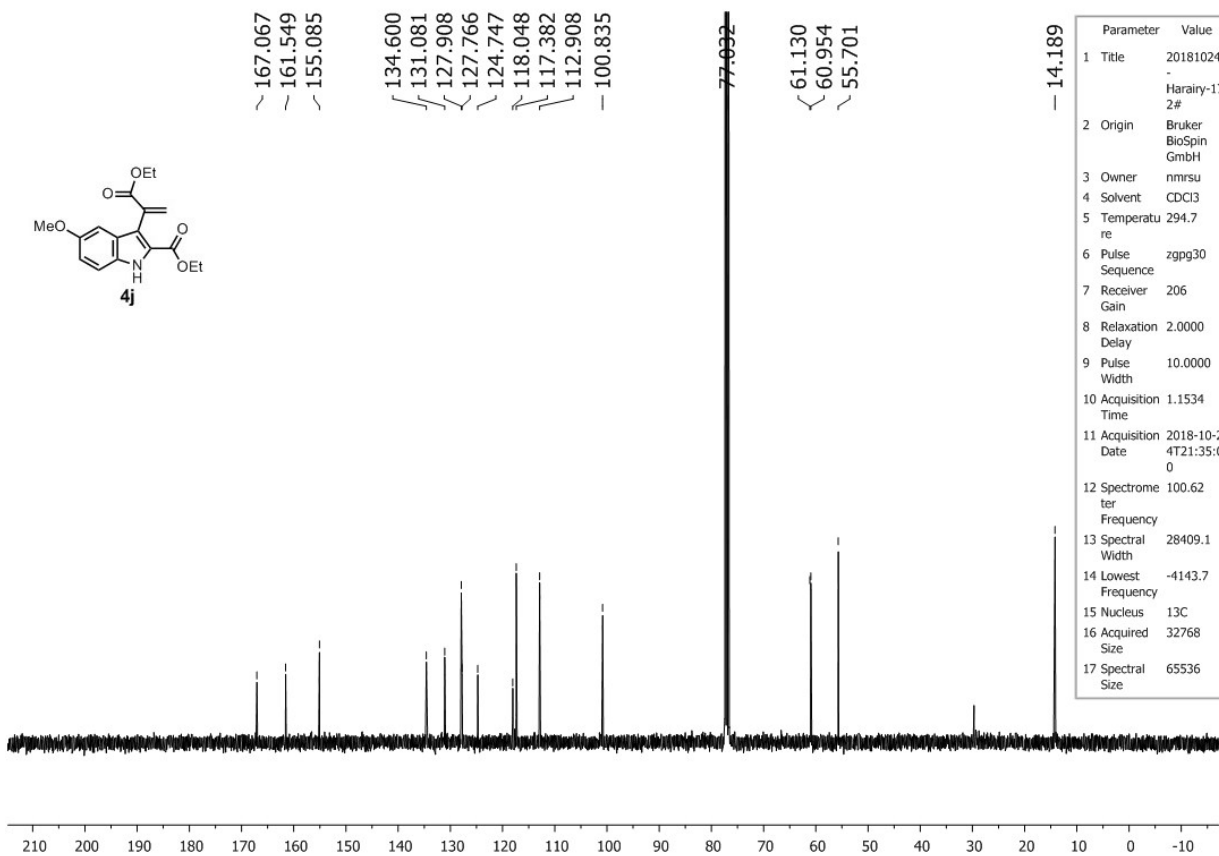

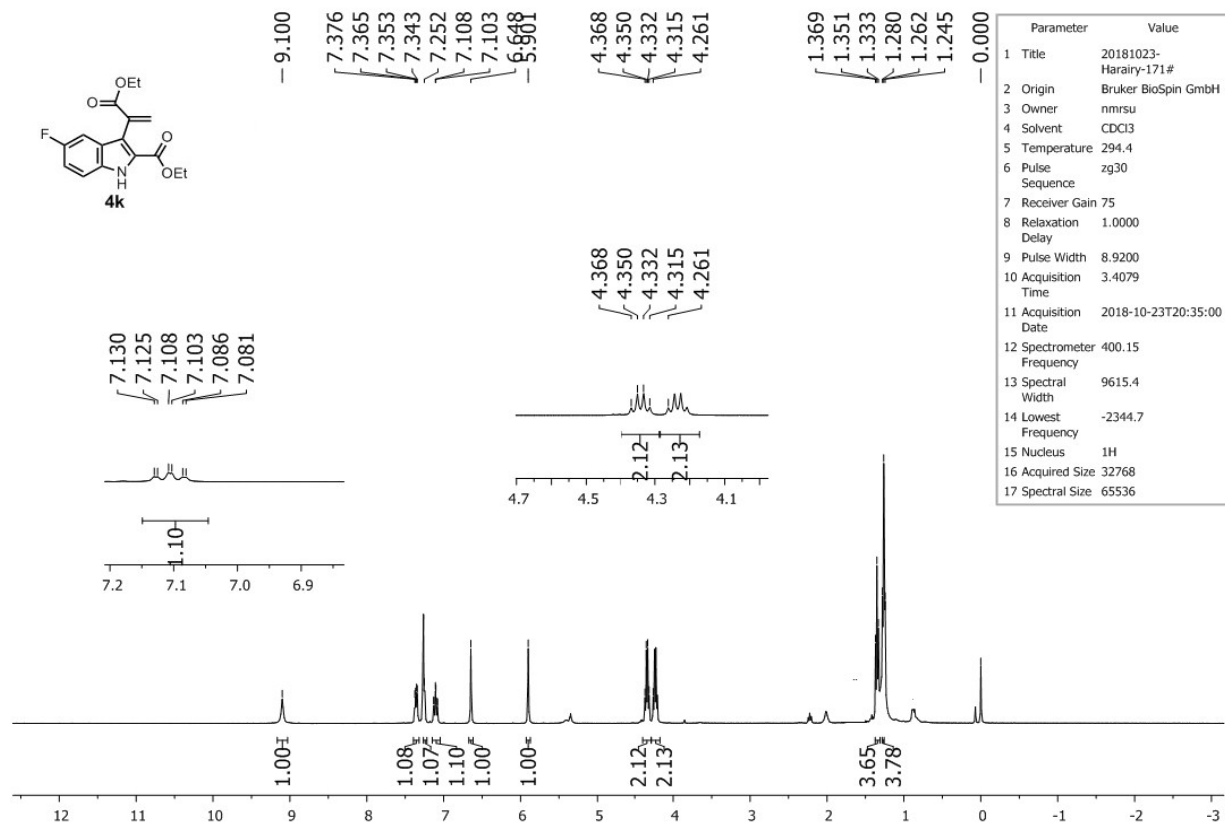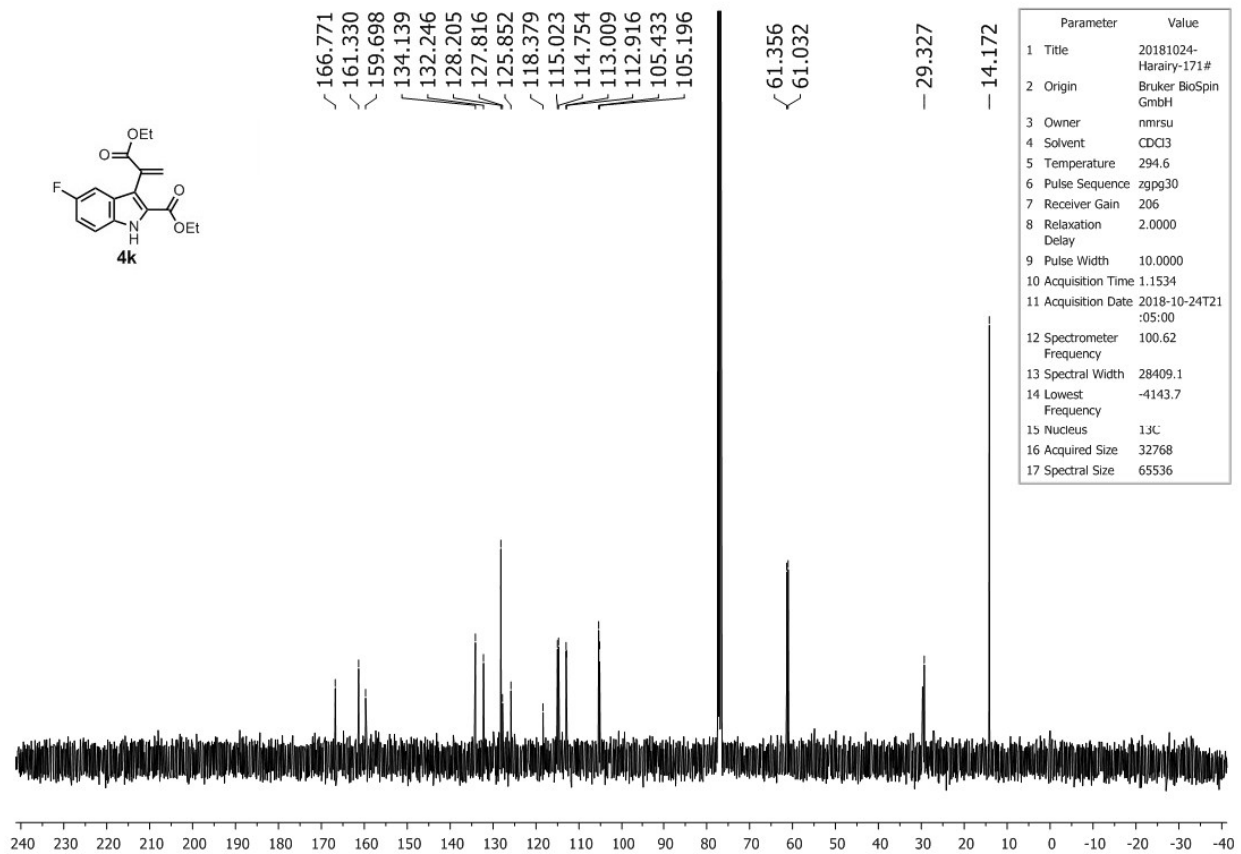

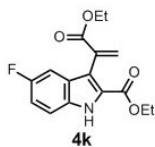

-121.964  
 -121.976  
 -121.989  
 -121.999  
 -122.012  
 -122.023

-121.964  
 -121.976  
 -121.989  
 -121.999  
 -122.012  
 -122.023

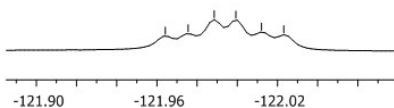

| Parameter                 | Value                 |
|---------------------------|-----------------------|
| 1 Title                   | 20181108-Harairy-171# |
| 2 Origin                  | Bruker BioSpin GmbH   |
| 3 Owner                   | nmsu                  |
| 4 Solvent                 | CDCl3                 |
| 5 Temperature             | 295.3                 |
| 6 Pulse Sequence          | zgfgqn                |
| 7 Receiver Gain           | 206                   |
| 8 Relaxation Delay        | 1.5000                |
| 9 Pulse Width             | 14.0000               |
| 10 Acquisition Time       | 0.5767                |
| 11 Acquisition Date       | 2018-11-08T23:05:00   |
| 12 Spectrometer Frequency | 376.52                |
| 13 Spectral Width         | 113636.4              |
| 14 Lowest Frequency       | -75644.0              |
| 15 Nucleus                | 19F                   |
| 16 Acquired Size          | 65536                 |
| 17 Spectral Size          | 131072                |

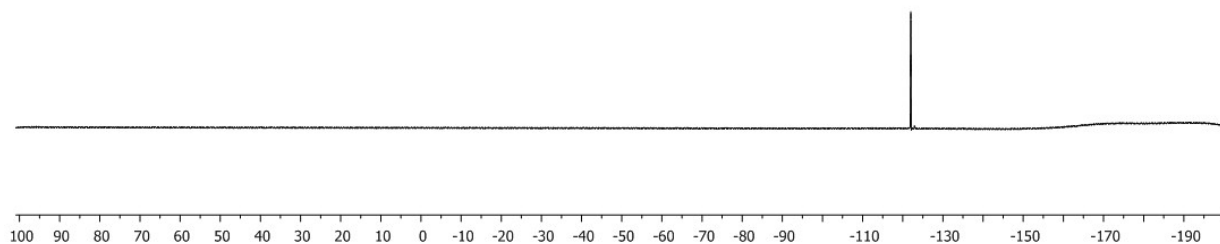





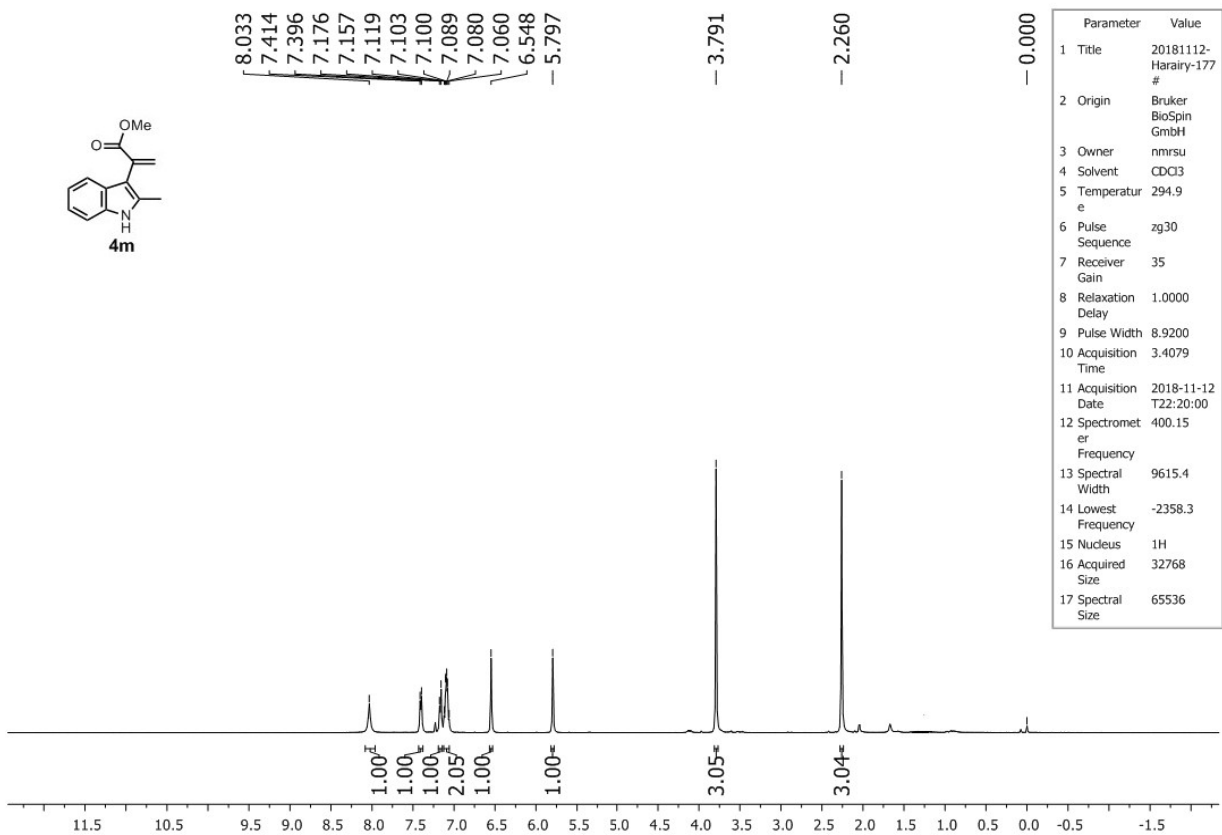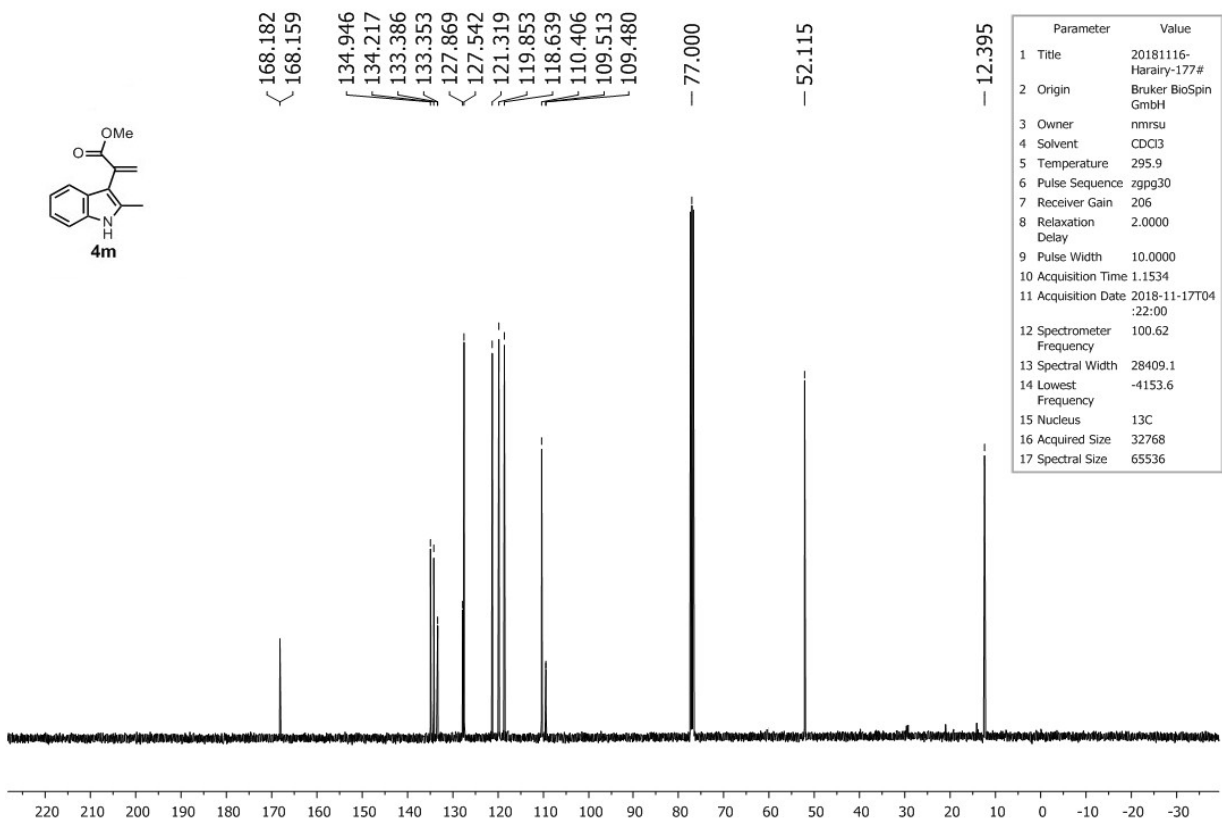

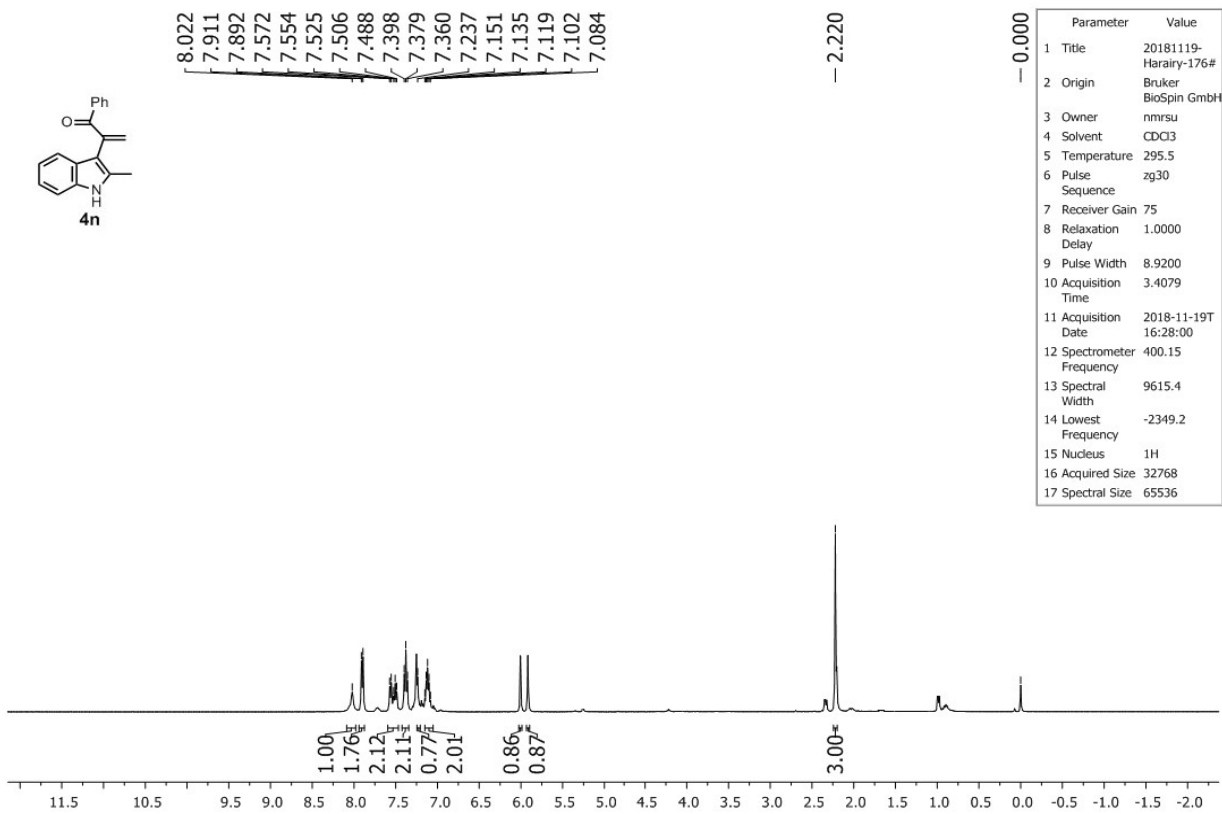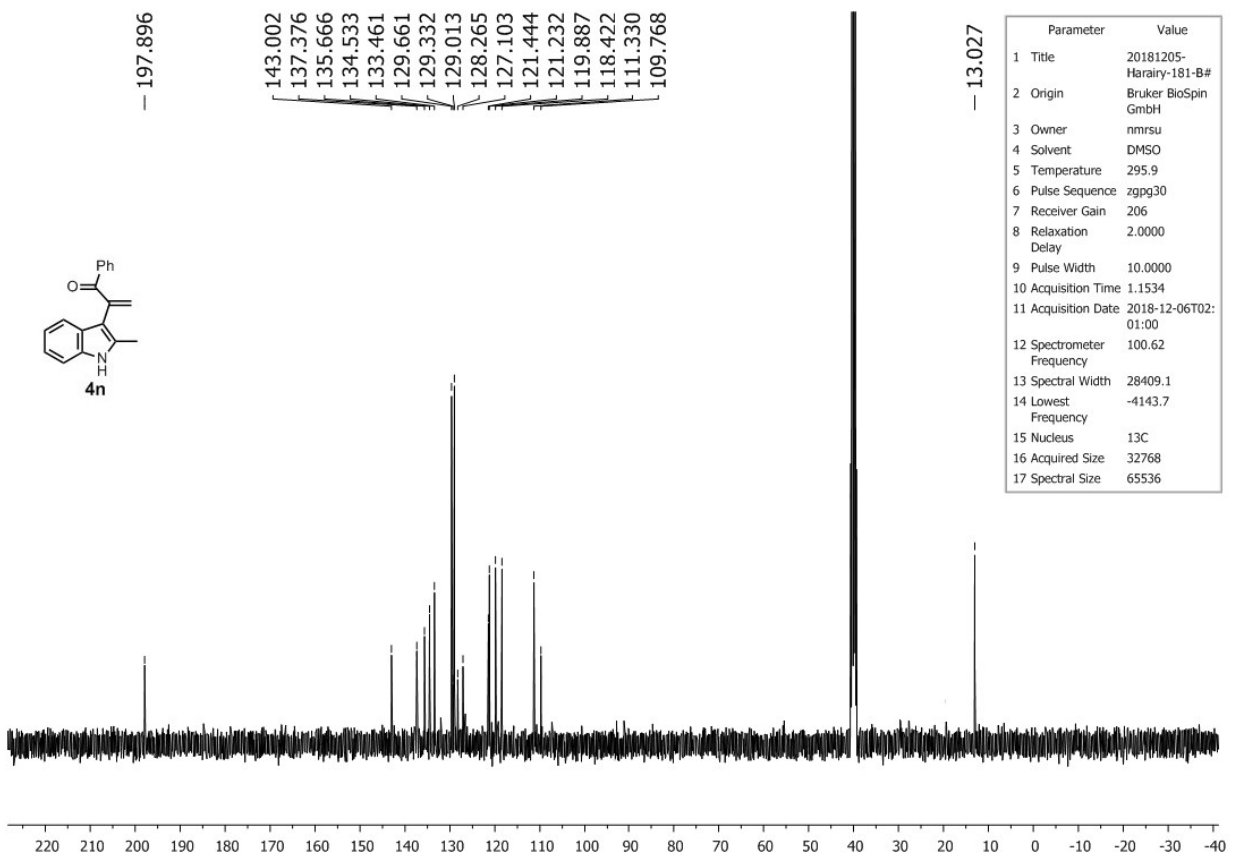

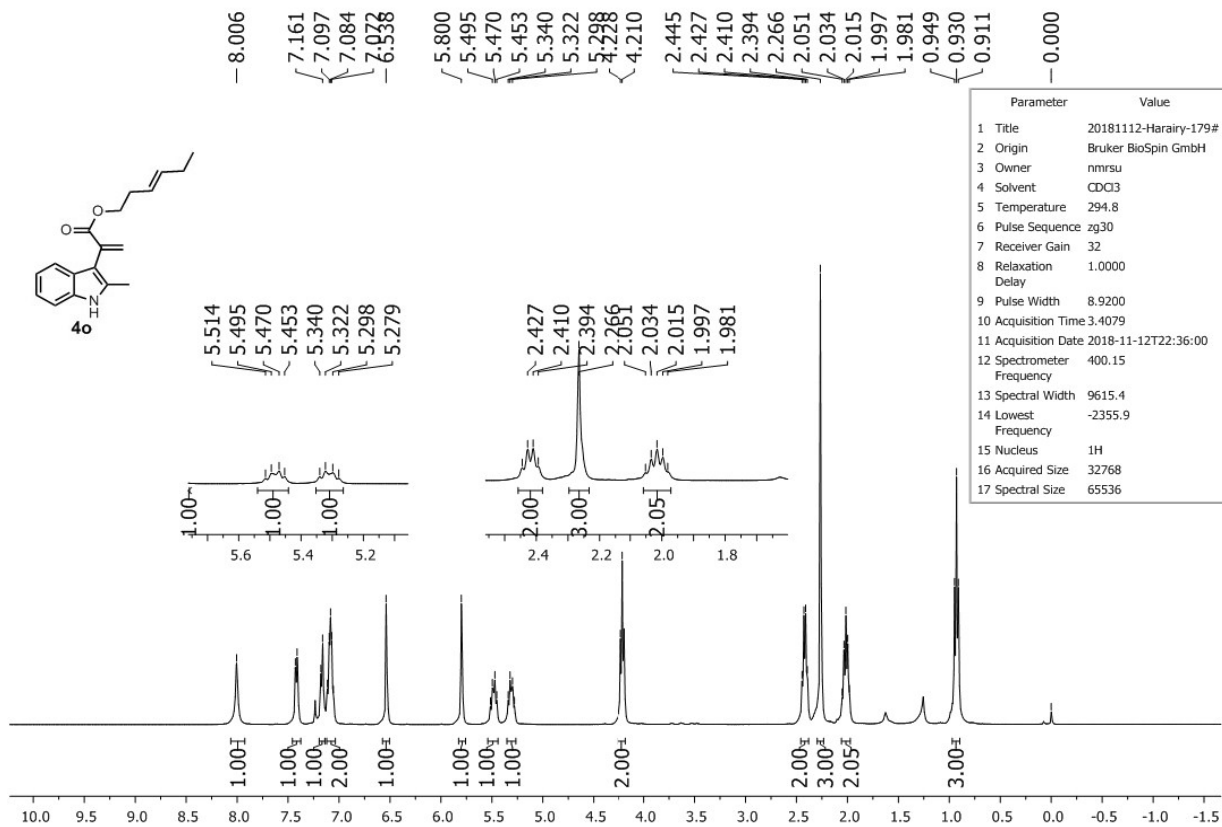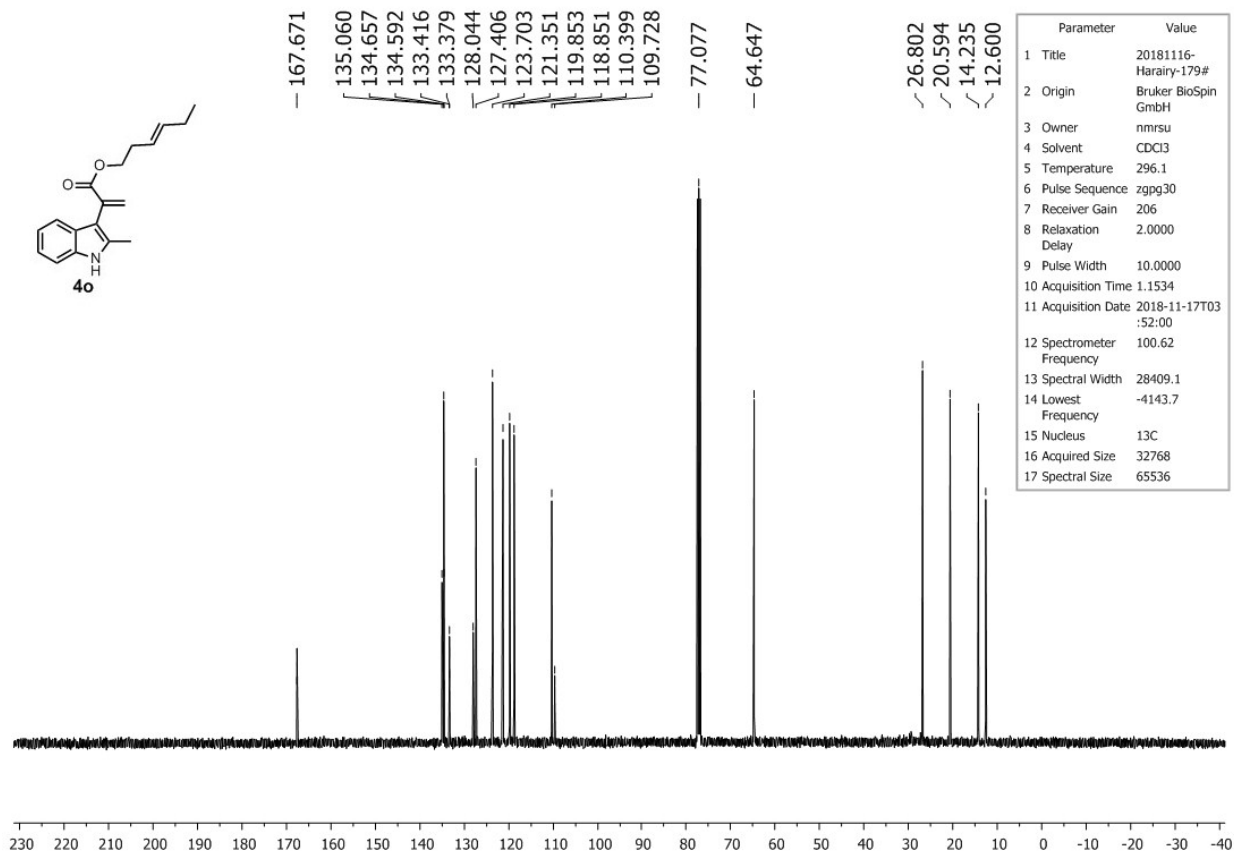

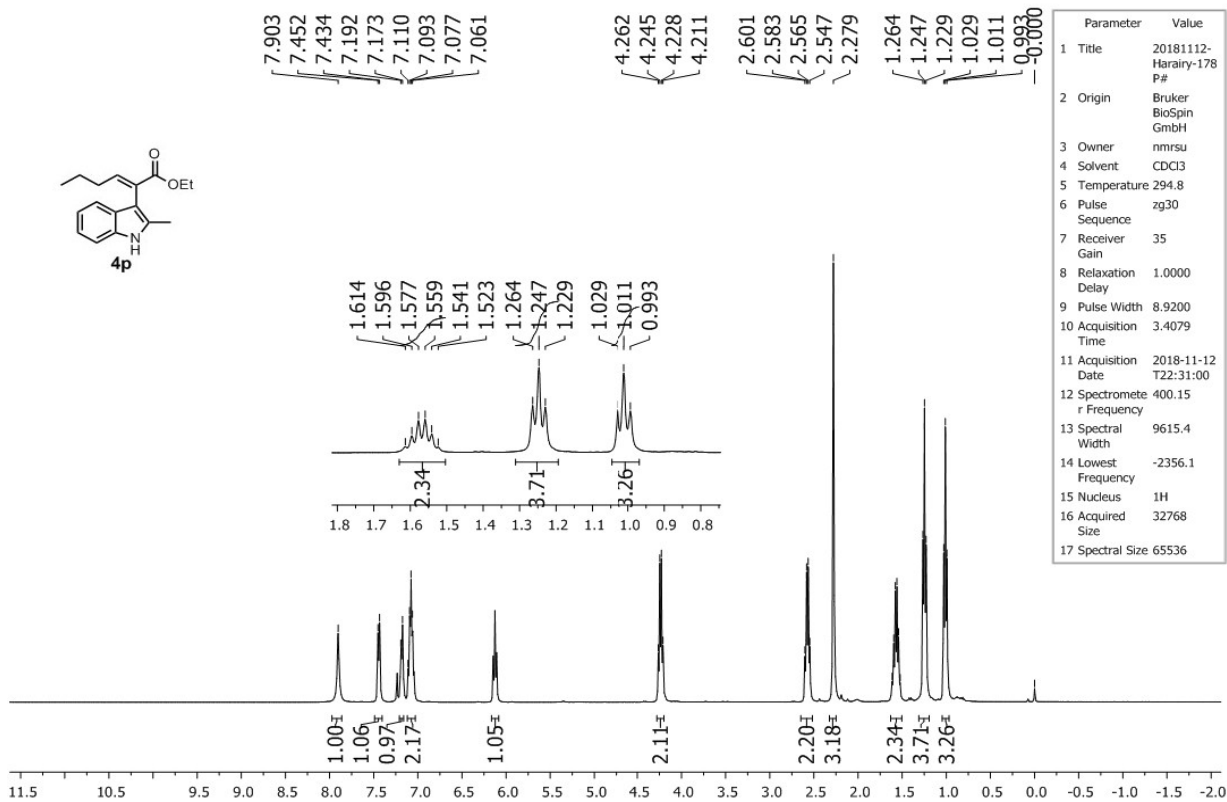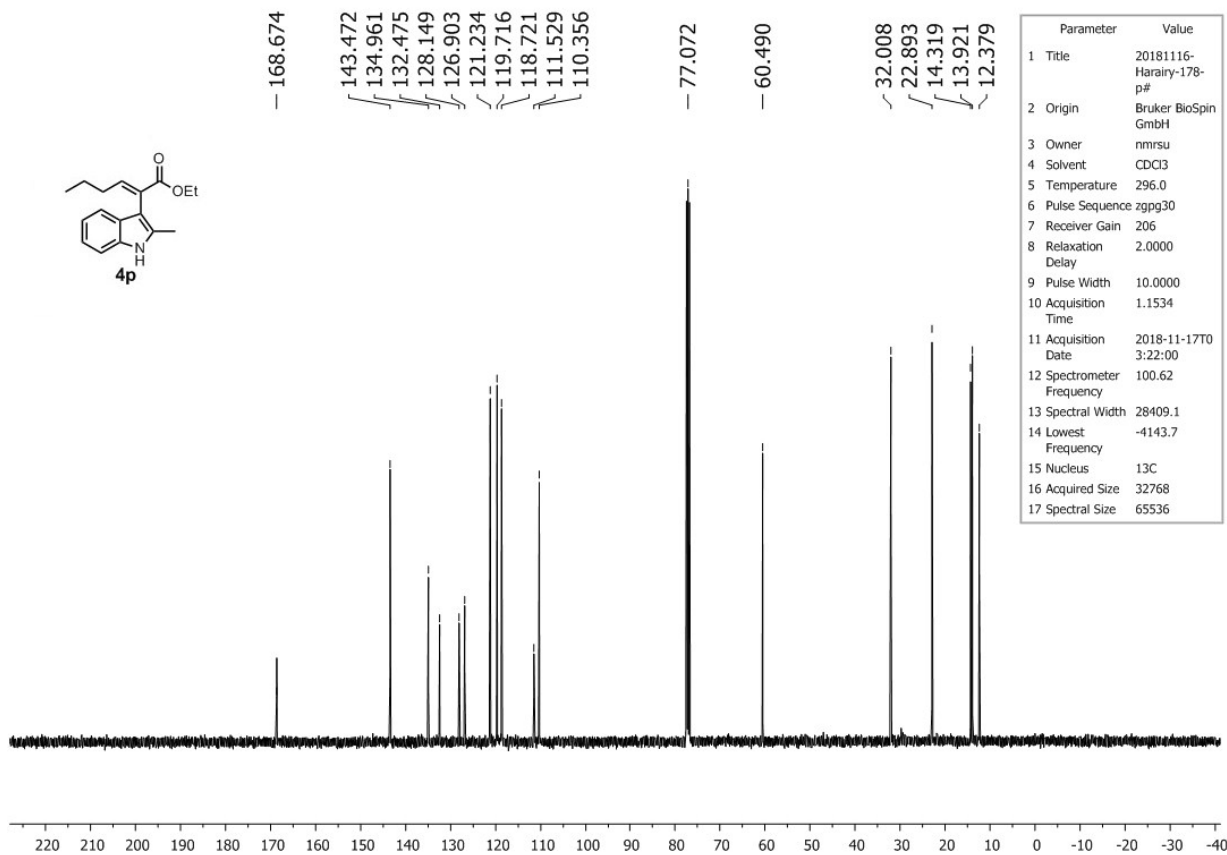

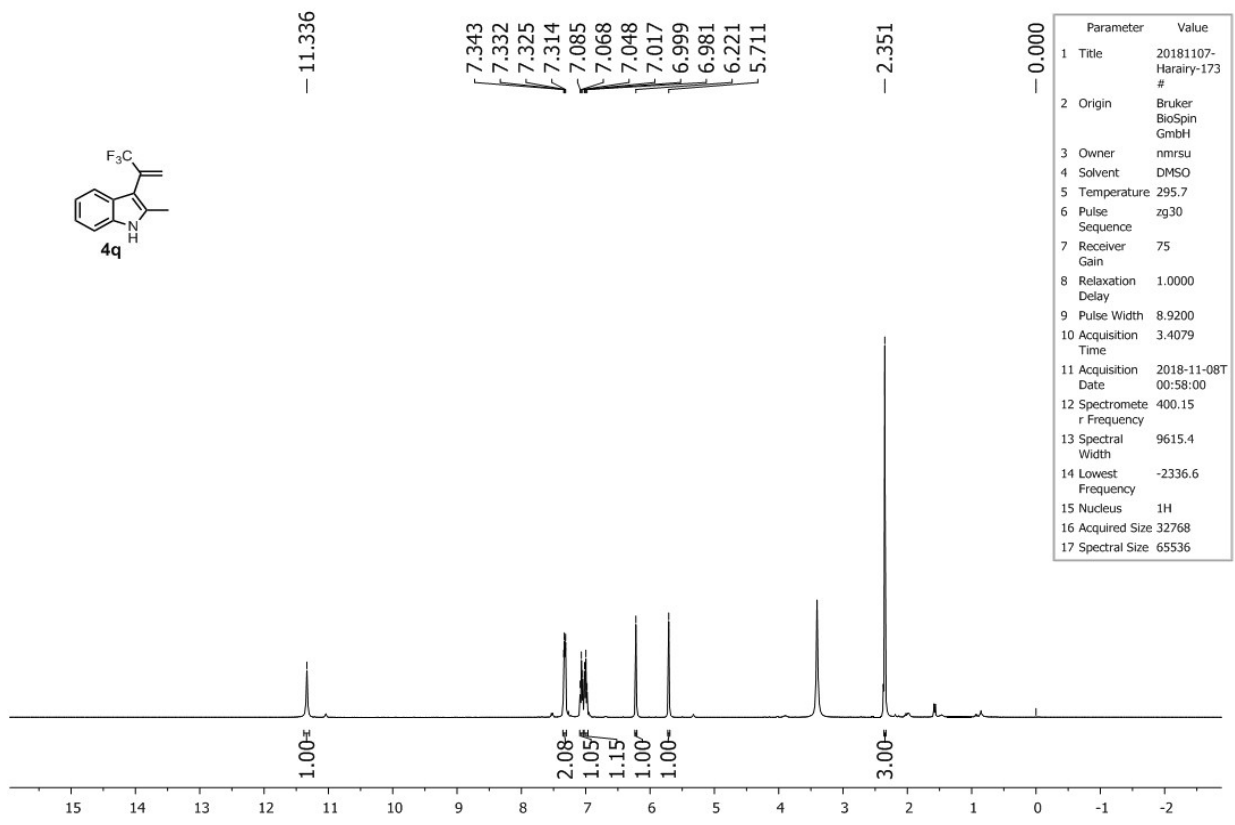

| Parameter                 | Value                  |
|---------------------------|------------------------|
| 1 Title                   | 20181107-Harairy-173 # |
| 2 Origin                  | Bruker BioSpin GmbH    |
| 3 Owner                   | nmsu                   |
| 4 Solvent                 | DMSO                   |
| 5 Temperature             | 295.7                  |
| 6 Pulse Sequence          | zg30                   |
| 7 Receiver Gain           | 75                     |
| 8 Relaxation Delay        | 1.0000                 |
| 9 Pulse Width             | 8.9200                 |
| 10 Acquisition Time       | 3.4079                 |
| 11 Acquisition Date       | 2018-11-08 00:58:00    |
| 12 Spectrometer Frequency | 400.15                 |
| 13 Spectral Width         | 9615.4                 |
| 14 Lowest Frequency       | -2336.6                |
| 15 Nucleus                | <sup>1</sup> H         |
| 16 Acquired Size          | 32768                  |
| 17 Spectral Size          | 65536                  |

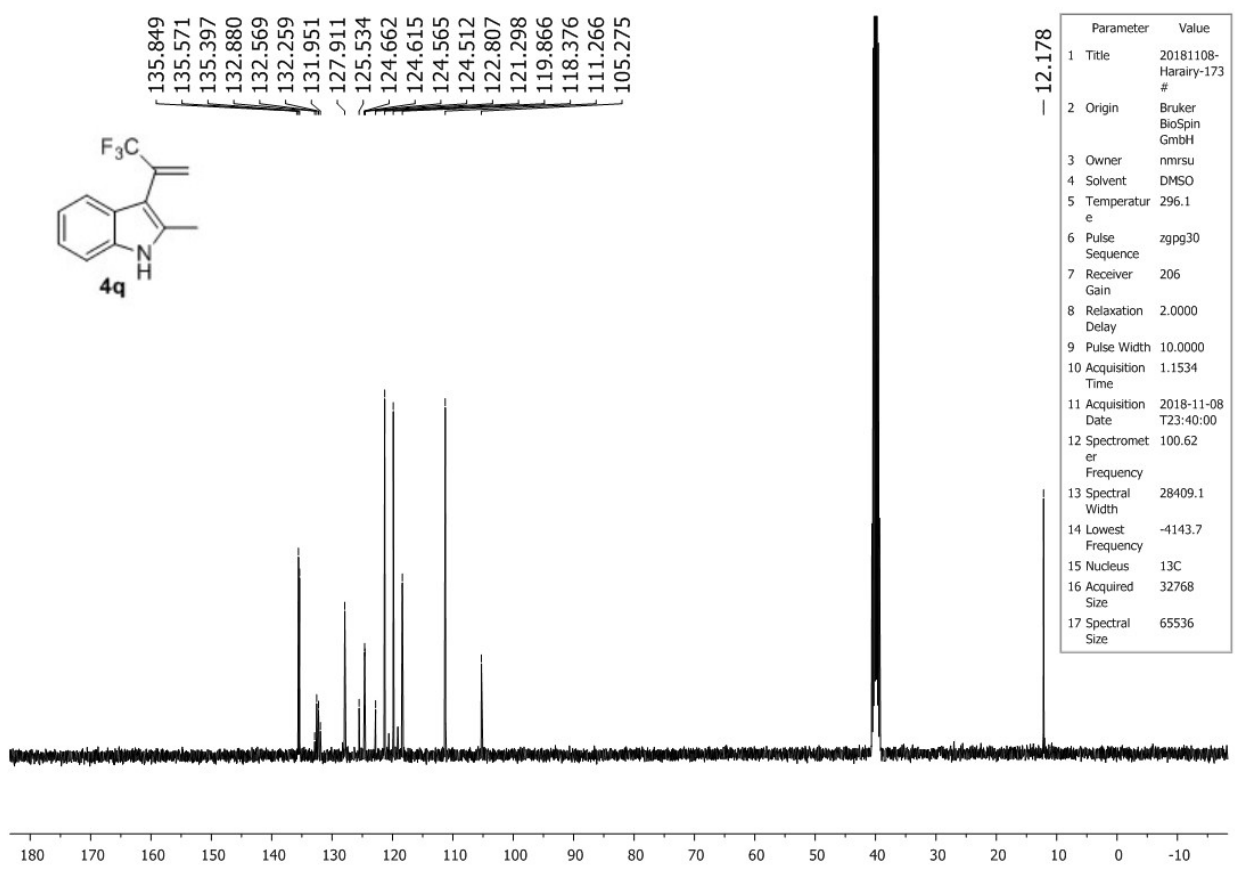

| Parameter                 | Value                  |
|---------------------------|------------------------|
| 1 Title                   | 20181108-Harairy-173 # |
| 2 Origin                  | Bruker BioSpin GmbH    |
| 3 Owner                   | nmsu                   |
| 4 Solvent                 | DMSO                   |
| 5 Temperature             | 296.1                  |
| 6 Pulse Sequence          | zgpg30                 |
| 7 Receiver Gain           | 206                    |
| 8 Relaxation Delay        | 2.0000                 |
| 9 Pulse Width             | 10.0000                |
| 10 Acquisition Time       | 1.1534                 |
| 11 Acquisition Date       | 2018-11-08 T23:40:00   |
| 12 Spectrometer Frequency | 100.62                 |
| 13 Spectral Width         | 28409.1                |
| 14 Lowest Frequency       | -4143.7                |
| 15 Nucleus                | <sup>13</sup> C        |
| 16 Acquired Size          | 32768                  |
| 17 Spectral Size          | 65536                  |

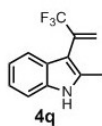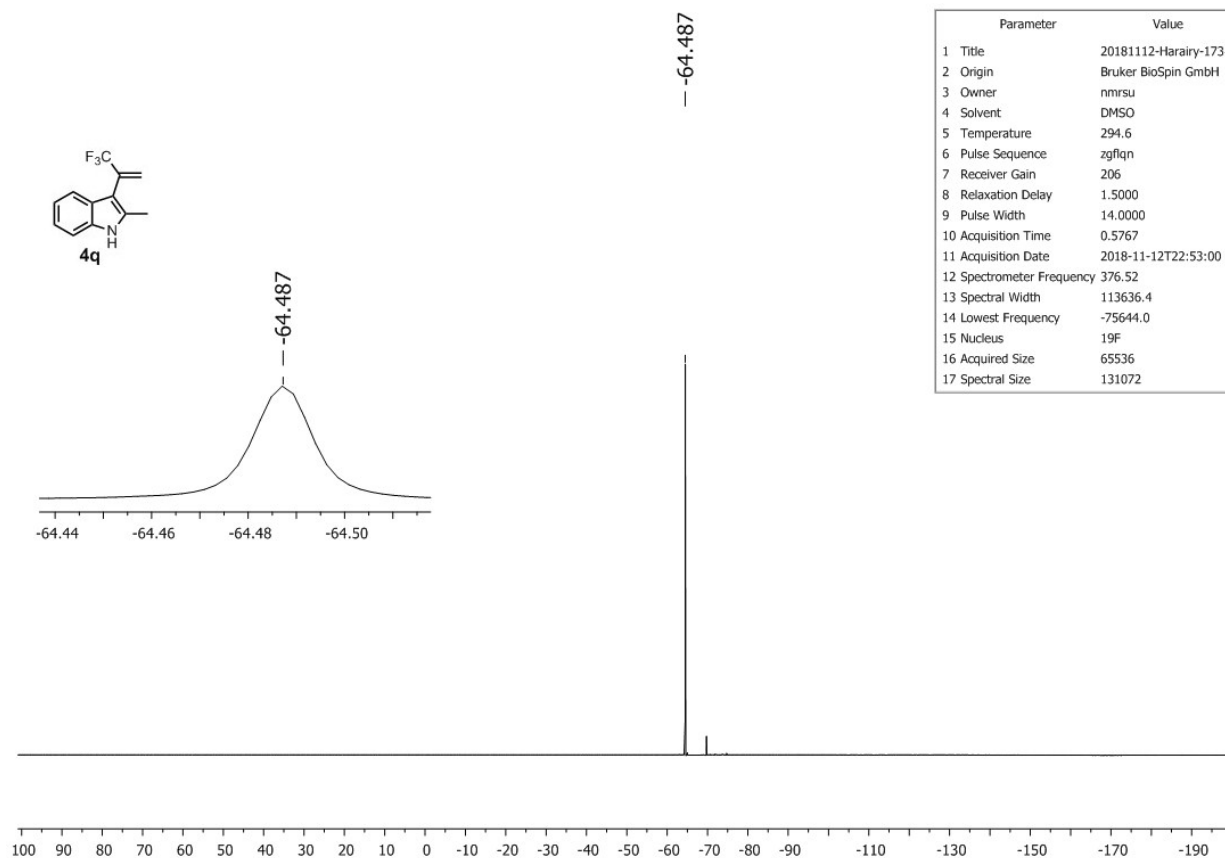

| Parameter                 | Value                 |
|---------------------------|-----------------------|
| 1 Title                   | 20181112-Harairy-173# |
| 2 Origin                  | Bruker BioSpin GmbH   |
| 3 Owner                   | nmrsu                 |
| 4 Solvent                 | DMSO                  |
| 5 Temperature             | 294.6                 |
| 6 Pulse Sequence          | zgfgqn                |
| 7 Receiver Gain           | 206                   |
| 8 Relaxation Delay        | 1.5000                |
| 9 Pulse Width             | 14.0000               |
| 10 Acquisition Time       | 0.5767                |
| 11 Acquisition Date       | 2018-11-12T22:53:00   |
| 12 Spectrometer Frequency | 376.52                |
| 13 Spectral Width         | 113636.4              |
| 14 Lowest Frequency       | -75644.0              |
| 15 Nucleus                | 13C                   |
| 16 Acquired Size          | 65536                 |
| 17 Spectral Size          | 131072                |

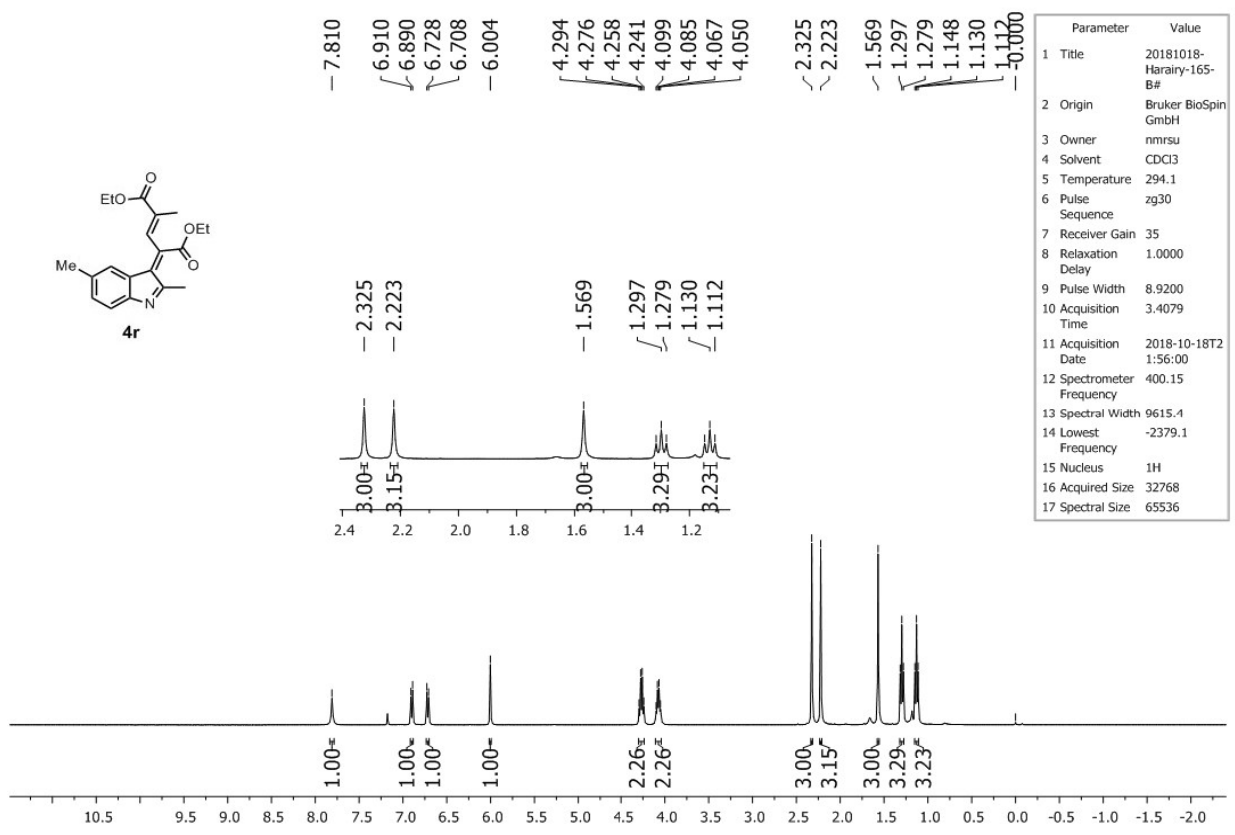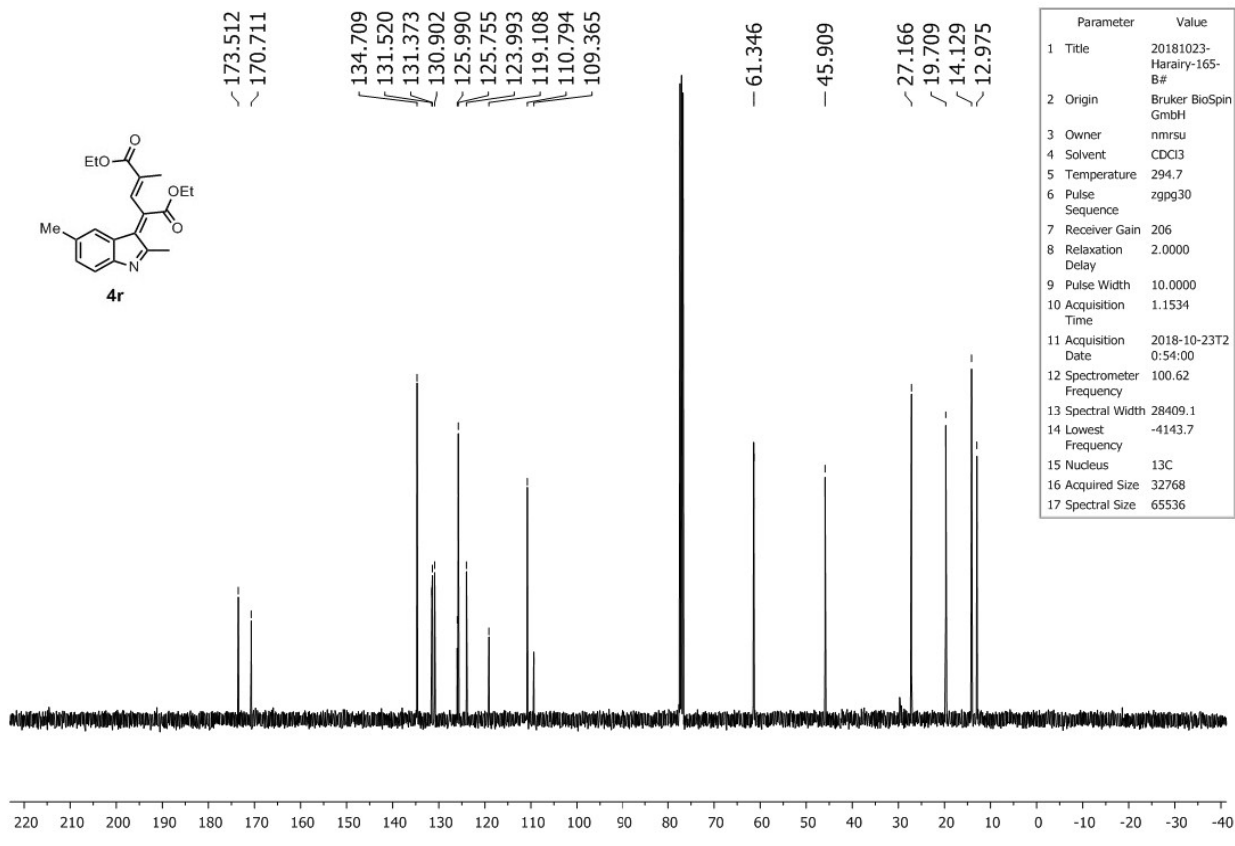





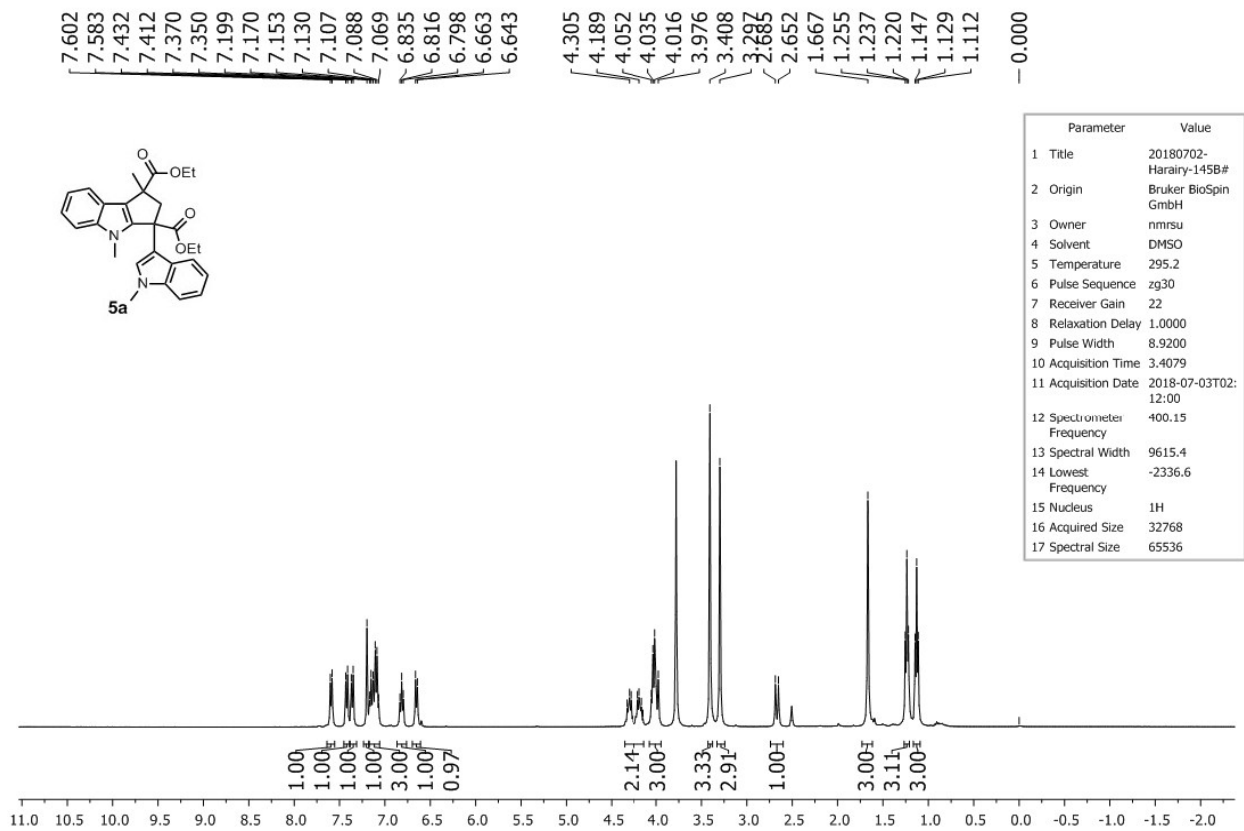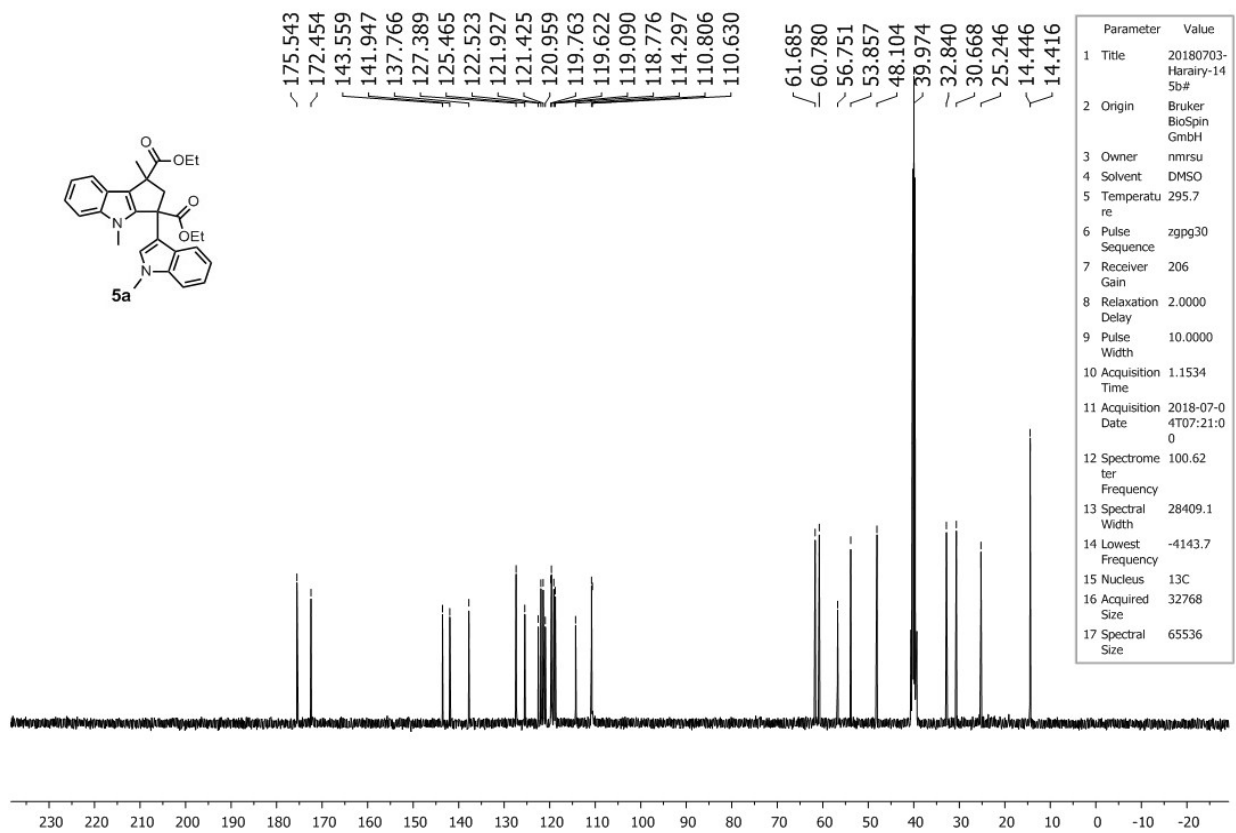

Supplement: d0ra00990c1.pdf [file d0ra00990c1.pdf]
